# Supplementary material for: Investigation of the Link between Per- and Polyfluoroalkyl Substances and Stress Biomarkers in Bottlenose Dolphins (Tursiops truncatus)
Source: PubMed Central journal article supplement (PMC11137861; doi:10.1021/acs.est.3c06979), 2024-05-14
Supplement: es3c06979_si_001.pdf [file es3c06979_si_001.pdf]

Investigation of the Link between Per- and Polyfluoroalkyl Substances (PFAS) and Stress Biomarkers in Bottlenose Dolphins (*Tursiops truncatus*)

Baylin J. Bennett [ORCID: 0000-0001-6541-7868]<sup>1,7\*</sup>, Max T. Aung [ORCID: 0000-0001-5541-5447]<sup>2</sup>, Rudy Boonstra [ORCID: 0000-0003-1959-1077]<sup>3</sup>, Brendan Delehanty [ORCID: 0000-0002-6104-9049]<sup>3</sup>, Magali Houde [ORCID: 0000-0001-5013-6529]<sup>4</sup>, Derek C. sG. Muir [ORCID: 0000-0001-6631-9776]<sup>5</sup>, Patricia A. Fair [ORCID: 0000-0002-1431-7880]<sup>6</sup>, and Matthew O. Gribble [ORCID: 0000-0002-1614-2981]<sup>7</sup>

|               |           |
|---------------|-----------|
| Table S1..... | S2        |
| Table S2..... | S3        |
| Table S3..... | S4        |
| Table S4..... | S5        |
| Table S5..... | S6        |
| Table S6..... | S7 – S21  |
| Table S7..... | S21 – S35 |

**Table S1.** Sample sizes for location, sex, and age by years sampled.

|                | <b>n by year</b> |             |             |             |             |             |             |             |             |              |
|----------------|------------------|-------------|-------------|-------------|-------------|-------------|-------------|-------------|-------------|--------------|
|                | <b>2003</b>      | <b>2004</b> | <b>2005</b> | <b>2006</b> | <b>2010</b> | <b>2011</b> | <b>2012</b> | <b>2013</b> | <b>2015</b> | <b>Total</b> |
| IRL, FL        | 57               | 35          | 14          | 7           | 17          | 13          | 19          | 0           | 16          | 178          |
| Charleston, SC | 59               | 19          | 18          | 0           | 0           | 0           | 0           | 19          | 0           | 115          |
| Juvenile       | 32               | 21          | 13          | 2           | 2           | 2           | 0           | 1           | 2           | 75           |
| Adult          | 84               | 33          | 19          | 5           | 15          | 11          | 15          | 15          | 14          | 211          |
| Male           | 78               | 28          | 19          | 7           | 16          | 12          | 9           | 10          | 15          | 194          |
| Female         | 38               | 26          | 13          | 0           | 1           | 1           | 6           | 6           | 1           | 92           |

**Table S2.** Individual PFAS detection limits (ng/g wet weight) by year.

| <b>PFAS Limits of Detection by Year <sup>1</sup></b> |                               |             |             |             |             |             |             |             |             |             |
|------------------------------------------------------|-------------------------------|-------------|-------------|-------------|-------------|-------------|-------------|-------------|-------------|-------------|
| <b>Abbreviation</b>                                  | <b>Full Name</b>              | <b>2003</b> | <b>2004</b> | <b>2005</b> | <b>2006</b> | <b>2010</b> | <b>2011</b> | <b>2012</b> | <b>2013</b> | <b>2015</b> |
| PFDA                                                 | Perfluorodecanoic Acid        | 0.800       | 0.800       | 0.800       | 0.228       | 0.228       | 0.228       | 0.039       | 0.039       | 0.228       |
| PFDS                                                 | Perfluorodecane Sulfonic Acid | 0.800       | 0.800       | 0.800       | 0.275       | 0.275       | 0.275       | 0.005       | 0.005       | 0.275       |
| PFDoDA                                               | Perfluorododecanoic Acid      | 0.500       | 0.500       | 0.500       | 0.433       | 0.433       | 0.433       | 0.005       | 0.005       | 0.433       |
| PFHpA                                                | Perfluoroheptanoic Acid       | 0.800       | 0.800       | 0.800       | 0.276       | 0.276       | 0.276       | 0.042       | 0.042       | 0.276       |
| PFHxS                                                | Perfluorohexanesulphonic Acid | 0.500       | 0.500       | 0.500       | 0.293       | 0.293       | 0.293       | 0.030       | 0.030       | 0.293       |
| PFNA                                                 | Perfluorononanoic Acid        | 0.500       | 0.500       | 0.500       | 0.279       | 0.279       | 0.279       | 0.044       | 0.044       | 0.279       |
| PFOA                                                 | Perfluorooctanoic Acid        | 0.500       | 0.500       | 0.500       | 0.420       | 0.420       | 0.420       | 0.135       | 0.135       | 0.420       |
| PFOS                                                 | Perfluorooctanesulfonic Acid  | 0.500       | 0.500       | 0.500       | 0.600       | 0.600       | 0.600       | 1.046       | 1.046       | 0.600       |
| PFOSA                                                | Perfluorooctanesulfonamide    | 0.500       | 0.500       | 0.500       | 0.287       | 0.287       | 0.287       | 0.005       | 0.005       | 0.287       |
| PFTeA                                                | Perfluorotetradecanoic Acid   | 0.500       | 0.500       | 0.500       | 0.005       | 0.005       | 0.005       | 0.005       | 0.005       | 0.005       |
| PFTriA                                               | Perfluorotridecanoic Acid     | 0.400       | 0.400       | 0.400       | 0.005       | 0.005       | 0.005       | 0.005       | 0.005       | 0.005       |
| PFUnDA                                               | Perfluoroundecanoic Acid      | 0.800       | 0.800       | 0.800       | 0.235       | 0.235       | 0.235       | 0.028       | 0.028       | 0.235       |

<sup>1</sup> Data and LODs reported in Houde, M.; Wells, R. S.; Fair, P. A.; Bossart, G. D.; Hohn, A. A.; Rowles, T. K.; Sweeney, J. C.; Solomon, K. R.; Muir, D. C. Polyfluoroalkyl compounds in free-ranging bottlenose dolphins (*Tursiops truncatus*) from the Gulf of Mexico and the Atlantic Ocean. *Environ Sci Technol* **2005**, 39 (17), 6591-6598. DOI: 10.1021/es0506556 From NLM Medline.

**Table S3.** PFAS tertile sample sizes, means (ng/g), and cutoff ranges.

| <b>PFAS</b> | <b>Measure</b> | <b>Tertile 1</b> | <b>Tertile 2</b>  | <b>Tertile 3</b> |
|-------------|----------------|------------------|-------------------|------------------|
| PFDA        | n              | 93               | 91                | 92               |
|             | Median         | 5.06             | 19.70             | 129.09           |
|             | Range          | 2.06 – 11.07     | >11.07 – 63.40    | >63.40           |
| PFDS        | n              | 41               | 41                | 41               |
|             | Median         | 1.15             | 2.26              | 16.98            |
|             | Range          | 0.76 – 1.44      | >1.44 – 4.11      | >4.11            |
| PFDoDA      | n              | 92               | 92                | 92               |
|             | Median         | 0.77             | 2.44              | 9.55             |
|             | Range          | 0.18 – 1.45      | >1.45 – 4.73      | >4.73            |
| PFHpA       | n              | 59               | 21                | 40               |
|             | Median         | 0.76             | 1.00              | 5.07             |
|             | Range          | 0.12 – 0.83      | >0.83 – 1.12      | >1.12            |
| PFHxS       | n              | 92               | 93                | 91               |
|             | Median         | 8.02             | 21.80             | 111.40           |
|             | Range          | 2.31 – 13.30     | >13.30 – 44.41    | >44.41           |
| PFNA        | n              | 92               | 93                | 91               |
|             | Median         | 6.23             | 15.89             | 72.30            |
|             | Min-Max        | 0.25 – 9.42      | >9.42 – 33.78     | >33.78           |
| PFOA        | n              | 92               | 92                | 92               |
|             | Median         | 3.67             | 10.54             | 42.65            |
|             | Min-Max        | 0.25 – 5.78      | >5.78 – 23.24     | >23.24           |
| PFOS        | n              | 80               | 79                | 79               |
|             | Median         | 250.87           | 706.06            | 1751.26          |
|             | Min-Max        | 69.21 – 409.00   | >409.00 – 1055.24 | >1055.24         |
| PFOSA       | n              | 80               | 80                | 80               |
|             | Median         | 0.50             | 4.39              | 29.92            |
|             | Min-Max        | 0.21 – 0.96      | >0.96 – 14.20     | >14.20           |
| PFTeA       | n              | 71               | 21                | 46               |
|             | Median         | 0.40             | 0.61              | 1.74             |
|             | Min-Max        | 0.21 – 0.40      | >0.40 – 0.84      | >0.84            |
| PFTriA      | n              | 39               | 33                | 36               |
|             | Median         | 0.40             | 1.61              | 4.14             |
|             | Min-Max        | 0.40             | >0.40 – 2.20      | >2.20            |
| PFUnDA      | n              | 92               | 93                | 91               |
|             | Median         | 5.87             | 12.80             | 64.14            |
|             | Min-Max        | 1.78 – 8.22      | >8.22 – 32.01     | >32.01           |

**Table S4.** Distributions for each PFAS-cortisol model.

Note: each respective PFAS-Cortisol model (e.g., stratified, unadjusted, etc.) was fit using the below distributions.

| <b>PFAS</b>   | <b>Model Distributions</b> |              |              |
|---------------|----------------------------|--------------|--------------|
|               | <b>Free</b>                | <b>Bound</b> | <b>Total</b> |
| <b>PFOS</b>   | Weibull                    | Lognormal    | Weibull      |
| <b>PFOA</b>   | Weibull                    | Lognormal    | Weibull      |
| <b>PFOSA</b>  | Weibull                    | Lognormal    | Weibull      |
| <b>PFDA</b>   | Weibull                    | Lognormal    | Weibull      |
| <b>PFDoDA</b> | Weibull                    | Lognormal    | Weibull      |
| <b>PFDS</b>   | Lognormal                  | Lognormal    | Weibull      |
| <b>PFHxS</b>  | Weibull                    | Lognormal    | Weibull      |
| <b>PFHpA</b>  | Lognormal                  | Lognormal    | Weibull      |
| <b>PFNA</b>   | Weibull                    | Lognormal    | Weibull      |
| <b>PFTeA</b>  | Weibull                    | Lognormal    | Weibull      |
| <b>PFTriA</b> | Weibull                    | Lognormal    | Weibull      |
| <b>PFUnDA</b> | Weibull                    | Lognormal    | Weibull      |
| <b>ΣPFCA</b>  | Weibull                    | Lognormal    | Weibull      |
| <b>ΣPFSA</b>  | Weibull                    | Lognormal    | Weibull      |
| <b>ΣPFAS</b>  | Weibull                    | Lognormal    | Weibull      |

**Table S5.** Principal component analysis with log transformed PFAS. Both perfluoroalkyl carboxylic acid (CA) and perfluoroalkyl sulfonic acids and sulfonamides (SA) were included.

| <b>log(PFAS)</b> | <b>Class</b> | <b>Measure</b> | <b>PCA1</b> | <b>PCA2</b> | <b>PCA3</b> |
|------------------|--------------|----------------|-------------|-------------|-------------|
|                  |              | Eigenvalue     | 8.63        | 0.89        | 0.64        |
|                  |              | Proportion     | 78.5%       | 8.1%        | 5.8%        |
|                  |              | Cumulative     | 78.5%       | 86.6%       | 92.4%       |
| PFDA             | CA           | Loading        | 0.33        | -0.19       | 0.12        |
| PFDODA           | CA           | Loading        | 0.32        | 0.27        | -0.05       |
| PFNA             | CA           | Loading        | 0.33        | -0.19       | 0.08        |
| PFOA             | CA           | Loading        | 0.32        | -0.30       | -0.02       |
| PFHpA            | CA           | Loading        | 0.25        | 0.06        | 0.66        |
| PFTeA            | CA           | Loading        | 0.25        | 0.67        | -0.09       |
| PFTriA           | CA           | Loading        | 0.31        | 0.35        | 0.12        |
| PFUnDA           | CA           | Loading        | 0.32        | -0.19       | -0.05       |
| PFDS             | SA           | Loading        | 0.32        | 0.14        | -0.29       |
| PFHxS            | SA           | Loading        | 0.26        | -0.17       | -0.64       |
| PFOSA            | SA           | Loading        | 0.31        | -0.31       | 0.16        |

**Table S6.** Regression coefficients, 95% confidence intervals, and sample sizes (n) for each adjusted model.

| <b>Stratification</b> | <b>Cortisol</b> | <b>PFAS Tertile</b>    | <b>Quantile Ratio</b> | <b>95% Confidence Interval</b> |       | <b>n</b> |
|-----------------------|-----------------|------------------------|-----------------------|--------------------------------|-------|----------|
| None                  | Free            | PFDA Tertile 2 vs. 1   | 1.110                 | 0.873                          | 1.412 | 211      |
| None                  | Free            | PFDA Tertile 3 vs. 1   | 1.295                 | 0.937                          | 1.790 |          |
| None                  | Free            | PFDoDA Tertile 2 vs. 1 | 1.223                 | 0.992                          | 1.509 | 211      |
| None                  | Free            | PFDoDA Tertile 3 vs. 1 | 1.120                 | 0.885                          | 1.417 |          |
| None                  | Free            | PFHpA Tertile 2 vs. 1  | 0.853                 | 0.360                          | 2.022 | 85       |
| None                  | Free            | PFHpA Tertile 3 vs. 1  | 0.933                 | 0.587                          | 1.485 |          |
| None                  | Free            | PFNA Tertile 2 vs. 1   | 0.881                 | 0.692                          | 1.120 | 211      |
| None                  | Free            | PFNA Tertile 3 vs. 1   | 0.873                 | 0.613                          | 1.243 |          |
| None                  | Free            | PFOA Tertile 2 vs. 1   | 0.682                 | 0.546                          | 0.850 | 211      |
| None                  | Free            | PFOA Tertile 3 vs. 1   | 0.765                 | 0.562                          | 1.041 |          |
| None                  | Free            | PFTeA Tertile 2 vs. 1  | 1.276                 | 0.761                          | 2.139 | 102      |
| None                  | Free            | PFTeA Tertile 3 vs. 1  | 0.852                 | 0.688                          | 1.055 |          |
| None                  | Free            | PFTriA Tertile 2 vs. 1 | 1.502                 | 1.082                          | 2.085 | 77       |
| None                  | Free            | PFTriA Tertile 3 vs. 1 | 1.900                 | 1.310                          | 2.755 |          |
| None                  | Free            | PFUnDA Tertile 2 vs. 1 | 0.945                 | 0.734                          | 1.217 | 211      |
| None                  | Free            | PFUnDA Tertile 3 vs. 1 | 0.918                 | 0.668                          | 1.263 |          |
| None                  | Free            | PFDS Tertile 2 vs. 1   | 0.848                 | 0.452                          | 1.591 | 88       |
| None                  | Free            | PFDS Tertile 3 vs. 1   | 1.272                 | 0.538                          | 3.009 |          |
| None                  | Free            | PFHxS Tertile 2 vs. 1  | 0.876                 | 0.700                          | 1.096 | 211      |
| None                  | Free            | PFHxS Tertile 3 vs. 1  | 0.777                 | 0.605                          | 0.997 |          |
| None                  | Free            | PFOS Tertile 2 vs. 1   | 0.849                 | 0.654                          | 1.103 | 192      |
| None                  | Free            | PFOS Tertile 2 vs. 2   | 0.743                 | 0.570                          | 0.968 |          |
| None                  | Free            | PFOSA Tertile 2 vs. 1  | 0.789                 | 0.604                          | 1.031 | 184      |
| None                  | Free            | PFOSA Tertile 3 vs. 1  | 0.929                 | 0.651                          | 1.324 |          |
| None                  | Free            | ΣPFCA Tertile 2 vs. 1  | 0.691                 | 0.491                          | 0.973 | 150      |
| None                  | Free            | ΣPFCA Tertile 3 vs. 1  | 0.678                 | 0.433                          | 1.060 |          |
| None                  | Free            | ΣPFSA Tertile 2 vs. 1  | 0.807                 | 0.618                          | 1.053 | 150      |
| None                  | Free            | ΣPFSA Tertile 3 vs. 1  | 0.650                 | 0.504                          | 0.839 |          |
| None                  | Free            | ΣPFAS Tertile 2 vs. 1  | 0.885                 | 0.674                          | 1.163 | 192      |
| None                  | Free            | ΣPFAS Tertile 3 vs. 1  | 0.794                 | 0.597                          | 1.058 |          |

|      |       |                        |       |       |       |     |
|------|-------|------------------------|-------|-------|-------|-----|
| None | Bound | PFDA Tertile 2 vs. 1   | 1.265 | 1.096 | 1.460 | 219 |
| None | Bound | PFDA Tertile 3 vs. 1   | 1.286 | 1.005 | 1.647 |     |
| None | Bound | PFDODA Tertile 2 vs. 1 | 1.297 | 1.149 | 1.464 | 219 |
| None | Bound | PFDODA Tertile 3 vs. 1 | 1.227 | 1.037 | 1.451 |     |
| None | Bound | PFHpA Tertile 2 vs. 1  | 1.061 | 0.778 | 1.445 | 89  |
| None | Bound | PFHpA Tertile 3 vs. 1  | 1.071 | 0.848 | 1.352 |     |
| None | Bound | PFNA Tertile 2 vs. 1   | 1.092 | 0.947 | 1.260 | 219 |
| None | Bound | PFNA Tertile 3 vs. 1   | 1.045 | 0.823 | 1.328 |     |
| None | Bound | PFOA Tertile 2 vs. 1   | 1.009 | 0.873 | 1.166 | 219 |
| None | Bound | PFOA Tertile 3 vs. 1   | 0.905 | 0.745 | 1.099 |     |
| None | Bound | PFTeA Tertile 2 vs. 1  | 1.537 | 1.130 | 2.090 | 104 |
| None | Bound | PFTeA Tertile 3 vs. 1  | 1.356 | 1.135 | 1.620 |     |
| None | Bound | PFTriA Tertile 2 vs. 1 | 0.949 | 0.708 | 1.270 | 77  |
| None | Bound | PFTriA Tertile 3 vs. 1 | 1.091 | 0.757 | 1.573 |     |
| None | Bound | PFUnDA Tertile 2 vs. 1 | 1.225 | 1.059 | 1.417 | 219 |
| None | Bound | PFUnDA Tertile 3 vs. 1 | 1.290 | 1.038 | 1.604 |     |
| None | Bound | PFDS Tertile 2 vs. 1   | 1.246 | 1.006 | 1.544 | 92  |
| None | Bound | PFDS Tertile 3 vs. 1   | 1.613 | 1.199 | 2.170 |     |
| None | Bound | PFHxS Tertile 2 vs. 1  | 0.931 | 0.795 | 1.091 | 219 |
| None | Bound | PFHxS Tertile 3 vs. 1  | 1.011 | 0.855 | 1.196 |     |
| None | Bound | PFOS Tertile 2 vs. 1   | 1.161 | 0.990 | 1.360 | 200 |
| None | Bound | PFOS Tertile 2 vs. 2   | 1.166 | 0.981 | 1.386 |     |
| None | Bound | PFOSA Tertile 2 vs. 1  | 1.093 | 0.927 | 1.289 | 191 |
| None | Bound | PFOSA Tertile 3 vs. 1  | 0.900 | 0.635 | 1.276 |     |
| None | Bound | ΣPFCA Tertile 2 vs. 1  | 1.074 | 0.892 | 1.293 | 156 |
| None | Bound | ΣPFCA Tertile 3 vs. 1  | 1.059 | 0.780 | 1.439 |     |
| None | Bound | ΣPFSA Tertile 2 vs. 1  | 1.241 | 1.036 | 1.487 | 156 |
| None | Bound | ΣPFSA Tertile 3 vs. 1  | 1.233 | 1.022 | 1.487 |     |
| None | Bound | ΣPFAS Tertile 2 vs. 1  | 1.194 | 1.020 | 1.398 | 200 |
| None | Bound | ΣPFAS Tertile 3 vs. 1  | 1.209 | 1.015 | 1.440 |     |
| None | Total | PFDA Tertile 2 vs. 1   | 1.169 | 0.988 | 1.383 | 211 |
| None | Total | PFDA Tertile 3 vs. 1   | 1.289 | 1.021 | 1.627 |     |



|        |       |                        |       |       |       |     |
|--------|-------|------------------------|-------|-------|-------|-----|
| None   | Total | PFDODA Tertile 2 vs. 1 | 1.243 | 1.074 | 1.439 | 211 |
| None   | Total | PFDODA Tertile 3 vs. 1 | 1.211 | 1.034 | 1.418 |     |
| None   | Total | PFHpA Tertile 2 vs. 1  | 1.196 | 0.836 | 1.712 | 85  |
| None   | Total | PFHpA Tertile 3 vs. 1  | 0.980 | 0.820 | 1.172 |     |
| None   | Total | PFNA Tertile 2 vs. 1   | 0.937 | 0.795 | 1.104 | 211 |
| None   | Total | PFNA Tertile 3 vs. 1   | 0.935 | 0.756 | 1.158 |     |
| None   | Total | PFOA Tertile 2 vs. 1   | 0.795 | 0.680 | 0.930 | 211 |
| None   | Total | PFOA Tertile 3 vs. 1   | 0.808 | 0.659 | 0.991 |     |
| None   | Total | PFTeA Tertile 2 vs. 1  | 1.502 | 1.070 | 2.110 | 102 |
| None   | Total | PFTeA Tertile 3 vs. 1  | 0.992 | 0.856 | 1.151 |     |
| None   | Total | PFTriA Tertile 2 vs. 1 | 1.256 | 0.995 | 1.584 | 77  |
| None   | Total | PFTriA Tertile 3 vs. 1 | 1.595 | 1.237 | 2.055 |     |
| None   | Total | PFUnDA Tertile 2 vs. 1 | 0.998 | 0.833 | 1.195 | 211 |
| None   | Total | PFUnDA Tertile 3 vs. 1 | 1.001 | 0.793 | 1.262 |     |
| None   | Total | PFDS Tertile 2 vs. 1   | 1.083 | 0.851 | 1.380 | 88  |
| None   | Total | PFDS Tertile 3 vs. 1   | 1.315 | 0.930 | 1.860 |     |
| None   | Total | PFHxS Tertile 2 vs. 1  | 0.888 | 0.766 | 1.030 | 211 |
| None   | Total | PFHxS Tertile 3 vs. 1  | 0.845 | 0.713 | 1.001 |     |
| None   | Total | PFOS Tertile 2 vs. 1   | 0.951 | 0.806 | 1.123 | 192 |
| None   | Total | PFOS Tertile 2 vs. 2   | 0.867 | 0.717 | 1.048 |     |
| None   | Total | PFOSA Tertile 2 vs. 1  | 0.883 | 0.732 | 1.066 | 184 |
| None   | Total | PFOSA Tertile 3 vs. 1  | 0.943 | 0.729 | 1.220 |     |
| None   | Total | ΣPFCA Tertile 2 vs. 1  | 0.797 | 0.634 | 1.003 | 150 |
| None   | Total | ΣPFCA Tertile 3 vs. 1  | 0.775 | 0.579 | 1.036 |     |
| None   | Total | ΣPFSA Tertile 2 vs. 1  | 0.923 | 0.774 | 1.100 | 150 |
| None   | Total | ΣPFSA Tertile 3 vs. 1  | 0.802 | 0.664 | 0.969 |     |
| None   | Total | ΣPFAS Tertile 2 vs. 1  | 0.988 | 0.829 | 1.179 | 192 |
| None   | Total | ΣPFAS Tertile 3 vs. 1  | 0.930 | 0.760 | 1.138 |     |
| Female | Free  | PFDA Tertile 2 vs. 1   | 0.713 | 0.468 | 1.087 | 61  |
| Female | Free  | PFDA Tertile 3 vs. 1   | 0.691 | 0.432 | 1.106 |     |
| Female | Free  | PFDODA Tertile 2 vs. 1 | 0.882 | 0.555 | 1.402 | 61  |
| Female | Free  | PFDODA Tertile 3 vs. 1 | 0.866 | 0.548 | 1.367 |     |

|        |       |                        |       |       |       |    |
|--------|-------|------------------------|-------|-------|-------|----|
| Female | Free  | PFHpA Tertile 2 vs. 1  | 1.325 | 0.943 | 1.862 | 18 |
| Female | Free  | PFHpA Tertile 3 vs. 1  | 0.708 | 0.416 | 1.203 |    |
| Female | Free  | PFNA Tertile 2 vs. 1   | 0.838 | 0.523 | 1.345 | 61 |
| Female | Free  | PFNA Tertile 3 vs. 1   | 0.788 | 0.392 | 1.585 |    |
| Female | Free  | PFOA Tertile 2 vs. 1   | 0.544 | 0.387 | 0.765 | 61 |
| Female | Free  | PFOA Tertile 3 vs. 1   | 0.591 | 0.388 | 0.900 |    |
| Female | Free  | PFTeA Tertile 2 vs. 1  | 3.239 | 1.507 | 6.963 | 41 |
| Female | Free  | PFTeA Tertile 3 vs. 1  | 1.085 | 0.693 | 1.699 |    |
| Female | Free  | PFTriA Tertile 2 vs. 1 | 1.424 | 0.894 | 2.268 | 31 |
| Female | Free  | PFTriA Tertile 3 vs. 1 | 1.592 | 0.884 | 2.869 |    |
| Female | Free  | PFUnDA Tertile 2 vs. 1 | 1.144 | 0.643 | 2.033 | 61 |
| Female | Free  | PFUnDA Tertile 3 vs. 1 | 1.283 | 0.645 | 2.552 |    |
| Female | Free  | PFDS Tertile 2 vs. 1   | 1.346 | 1.099 | 1.650 | 18 |
| Female | Free  | PFDS Tertile 3 vs. 1   | 0.948 | 0.502 | 1.788 |    |
| Female | Free  | PFHxS Tertile 2 vs. 1  | 1.268 | 0.892 | 1.801 | 61 |
| Female | Free  | PFHxS Tertile 3 vs. 1  | 0.835 | 0.583 | 1.196 |    |
| Female | Free  | PFOS Tertile 2 vs. 1   | 1.005 | 0.624 | 1.618 | 55 |
| Female | Free  | PFOS Tertile 2 vs. 2   | 0.603 | 0.369 | 0.986 |    |
| Female | Free  | PFOSA Tertile 2 vs. 1  | 0.723 | 0.445 | 1.173 | 61 |
| Female | Free  | PFOSA Tertile 3 vs. 1  | 1.019 | 0.445 | 2.333 |    |
| Female | Free  | ΣPFCA Tertile 2 vs. 1  | 0.691 | 0.491 | 0.973 | 53 |
| Female | Free  | ΣPFCA Tertile 3 vs. 1  | 0.678 | 0.433 | 1.060 |    |
| Female | Free  | ΣPFSA Tertile 2 vs. 1  | 0.807 | 0.618 | 1.053 | 53 |
| Female | Free  | ΣPFSA Tertile 3 vs. 1  | 0.650 | 0.504 | 0.839 |    |
| Female | Free  | ΣPFAS Tertile 2 vs. 1  | 0.885 | 0.674 | 1.163 | 55 |
| Female | Free  | ΣPFAS Tertile 3 vs. 1  | 0.794 | 0.597 | 1.058 |    |
| Female | Bound | PFDA Tertile 2 vs. 1   | 1.274 | 0.952 | 1.706 | 61 |
| Female | Bound | PFDA Tertile 3 vs. 1   | 0.987 | 0.631 | 1.545 |    |
| Female | Bound | PFDoDA Tertile 2 vs. 1 | 1.116 | 0.872 | 1.427 | 61 |
| Female | Bound | PFDoDA Tertile 3 vs. 1 | 1.112 | 0.837 | 1.477 |    |
| Female | Bound | PFHpA Tertile 2 vs. 1  | 1.542 | 1.024 | 2.321 | 18 |
| Female | Bound | PFHpA Tertile 3 vs. 1  | 1.403 | 0.830 | 2.374 |    |

|        |       |                        |       |       |       |    |
|--------|-------|------------------------|-------|-------|-------|----|
| Female | Bound | PFNA Tertile 2 vs. 1   | 1.014 | 0.748 | 1.374 | 61 |
| Female | Bound | PFNA Tertile 3 vs. 1   | 1.362 | 0.873 | 2.123 |    |
| Female | Bound | PFOA Tertile 2 vs. 1   | 1.187 | 0.908 | 1.551 | 61 |
| Female | Bound | PFOA Tertile 3 vs. 1   | 1.323 | 0.964 | 1.817 |    |
| Female | Bound | PFTeA Tertile 2 vs. 1  | 1.437 | 0.551 | 3.749 | 41 |
| Female | Bound | PFTeA Tertile 3 vs. 1  | 1.312 | 0.946 | 1.820 |    |
| Female | Bound | PFTriA Tertile 2 vs. 1 | 0.799 | 0.565 | 1.130 | 31 |
| Female | Bound | PFTriA Tertile 3 vs. 1 | 0.887 | 0.530 | 1.483 |    |
| Female | Bound | PFUnDA Tertile 2 vs. 1 | 1.574 | 1.059 | 2.341 | 61 |
| Female | Bound | PFUnDA Tertile 3 vs. 1 | 1.516 | 0.968 | 2.373 |    |
| Female | Bound | PFDS Tertile 2 vs. 1   | 1.869 | 1.295 | 2.699 | 18 |
| Female | Bound | PFDS Tertile 3 vs. 1   | 0.841 | 0.426 | 1.657 |    |
| Female | Bound | PFHxS Tertile 2 vs. 1  | 1.077 | 0.781 | 1.484 | 61 |
| Female | Bound | PFHxS Tertile 3 vs. 1  | 1.301 | 0.958 | 1.768 |    |
| Female | Bound | PFOS Tertile 2 vs. 1   | 1.335 | 0.938 | 1.899 | 55 |
| Female | Bound | PFOS Tertile 2 vs. 2   | 1.410 | 0.998 | 1.991 |    |
| Female | Bound | PFOSA Tertile 2 vs. 1  | 0.951 | 0.698 | 1.295 | 61 |
| Female | Bound | PFOSA Tertile 3 vs. 1  | 0.767 | 0.420 | 1.399 |    |
| Female | Bound | ΣPFCA Tertile 2 vs. 1  | 1.074 | 0.892 | 1.293 | 53 |
| Female | Bound | ΣPFCA Tertile 3 vs. 1  | 1.059 | 0.780 | 1.439 |    |
| Female | Bound | ΣPFSA Tertile 2 vs. 1  | 1.241 | 1.036 | 1.487 | 53 |
| Female | Bound | ΣPFSA Tertile 3 vs. 1  | 1.233 | 1.022 | 1.487 |    |
| Female | Bound | ΣPFAS Tertile 2 vs. 1  | 1.194 | 1.020 | 1.398 | 55 |
| Female | Bound | ΣPFAS Tertile 3 vs. 1  | 1.209 | 1.015 | 1.440 |    |
| Female | Total | PFDA Tertile 2 vs. 1   | 0.847 | 0.635 | 1.129 | 61 |
| Female | Total | PFDA Tertile 3 vs. 1   | 0.749 | 0.530 | 1.057 |    |
| Female | Total | PFDoDA Tertile 2 vs. 1 | 0.920 | 0.688 | 1.229 | 61 |
| Female | Total | PFDoDA Tertile 3 vs. 1 | 0.936 | 0.690 | 1.271 |    |
| Female | Total | PFHpA Tertile 2 vs. 1  | 1.060 | 0.703 | 1.599 | 18 |
| Female | Total | PFHpA Tertile 3 vs. 1  | 0.877 | 0.570 | 1.348 |    |
| Female | Total | PFNA Tertile 2 vs. 1   | 0.915 | 0.659 | 1.271 | 61 |
| Female | Total | PFNA Tertile 3 vs. 1   | 0.991 | 0.606 | 1.619 |    |

|        |       |                        |       |       |       |     |
|--------|-------|------------------------|-------|-------|-------|-----|
| Female | Total | PFOA Tertile 2 vs. 1   | 0.684 | 0.547 | 0.856 | 61  |
| Female | Total | PFOA Tertile 3 vs. 1   | 0.757 | 0.572 | 1.002 |     |
| Female | Total | PFTeA Tertile 2 vs. 1  | 2.440 | 1.379 | 4.318 | 41  |
| Female | Total | PFTeA Tertile 3 vs. 1  | 1.076 | 0.799 | 1.450 |     |
| Female | Total | PFTriA Tertile 2 vs. 1 | 1.166 | 0.862 | 1.576 | 31  |
| Female | Total | PFTriA Tertile 3 vs. 1 | 1.423 | 1.009 | 2.005 |     |
| Female | Total | PFUnDA Tertile 2 vs. 1 | 1.178 | 0.703 | 1.975 | 61  |
| Female | Total | PFUnDA Tertile 3 vs. 1 | 1.272 | 0.701 | 2.307 |     |
| Female | Total | PFDS Tertile 2 vs. 1   | 1.706 | 1.405 | 2.071 | 18  |
| Female | Total | PFDS Tertile 3 vs. 1   | 0.846 | 0.567 | 1.261 |     |
| Female | Total | PFHxS Tertile 2 vs. 1  | 1.237 | 0.976 | 1.568 | 61  |
| Female | Total | PFHxS Tertile 3 vs. 1  | 0.962 | 0.780 | 1.187 |     |
| Female | Total | PFOS Tertile 2 vs. 1   | 1.112 | 0.822 | 1.503 | 55  |
| Female | Total | PFOS Tertile 2 vs. 2   | 0.791 | 0.580 | 1.079 |     |
| Female | Total | PFOSA Tertile 2 vs. 1  | 0.862 | 0.629 | 1.180 | 61  |
| Female | Total | PFOSA Tertile 3 vs. 1  | 0.982 | 0.598 | 1.614 |     |
| Female | Total | ΣPFCA Tertile 2 vs. 1  | 0.797 | 0.634 | 1.003 | 53  |
| Female | Total | ΣPFCA Tertile 3 vs. 1  | 0.775 | 0.579 | 1.036 |     |
| Female | Total | ΣPFSA Tertile 2 vs. 1  | 0.923 | 0.774 | 1.100 | 53  |
| Female | Total | ΣPFSA Tertile 3 vs. 1  | 0.802 | 0.664 | 0.969 |     |
| Female | Total | ΣPFAS Tertile 2 vs. 1  | 0.988 | 0.829 | 1.179 | 55  |
| Female | Total | ΣPFAS Tertile 3 vs. 1  | 0.930 | 0.760 | 1.138 |     |
| Male   | Free  | PFDA Tertile 2 vs. 1   | 1.261 | 0.954 | 1.666 | 150 |
| Male   | Free  | PFDA Tertile 3 vs. 1   | 1.568 | 1.058 | 2.323 |     |
| Male   | Free  | PFDoDA Tertile 2 vs. 1 | 1.258 | 0.980 | 1.615 | 150 |
| Male   | Free  | PFDoDA Tertile 3 vs. 1 | 1.107 | 0.827 | 1.481 |     |
| Male   | Free  | PFHpA Tertile 2 vs. 1  | 0.707 | 0.233 | 2.145 | 67  |
| Male   | Free  | PFHpA Tertile 3 vs. 1  | 0.847 | 0.478 | 1.500 |     |
| Male   | Free  | PFNA Tertile 2 vs. 1   | 0.818 | 0.624 | 1.071 | 150 |
| Male   | Free  | PFNA Tertile 3 vs. 1   | 0.833 | 0.539 | 1.286 |     |
| Male   | Free  | PFOA Tertile 2 vs. 1   | 0.703 | 0.543 | 0.911 | 150 |
| Male   | Free  | PFOA Tertile 3 vs. 1   | 0.825 | 0.568 | 1.198 |     |

|      |       |                        |       |       |       |     |
|------|-------|------------------------|-------|-------|-------|-----|
| Male | Free  | PFTeA Tertile 2 vs. 1  | 1.040 | 0.555 | 1.948 | 61  |
| Male | Free  | PFTeA Tertile 3 vs. 1  | 0.774 | 0.608 | 0.986 |     |
| Male | Free  | PFTriA Tertile 2 vs. 1 | 1.632 | 1.084 | 2.457 | 46  |
| Male | Free  | PFTriA Tertile 3 vs. 1 | 2.380 | 1.495 | 3.787 |     |
| Male | Free  | PUnDA Tertile 2 vs. 1  | 0.935 | 0.705 | 1.239 | 150 |
| Male | Free  | PUnDA Tertile 3 vs. 1  | 0.846 | 0.575 | 1.243 |     |
| Male | Free  | PFDS Tertile 2 vs. 1   | 0.720 | 0.360 | 1.440 | 70  |
| Male | Free  | PFDS Tertile 3 vs. 1   | 1.152 | 0.448 | 2.962 |     |
| Male | Free  | PFHxS Tertile 2 vs. 1  | 0.825 | 0.628 | 1.084 | 150 |
| Male | Free  | PFHxS Tertile 3 vs. 1  | 0.762 | 0.563 | 1.032 |     |
| Male | Free  | PFOS Tertile 2 vs. 1   | 0.789 | 0.579 | 1.075 | 137 |
| Male | Free  | PFOS Tertile 2 vs. 2   | 0.770 | 0.575 | 1.031 |     |
| Male | Free  | PFOSA Tertile 2 vs. 1  | 0.856 | 0.622 | 1.178 | 123 |
| Male | Free  | PFOSA Tertile 3 vs. 1  | 0.946 | 0.636 | 1.408 |     |
| Male | Free  | ΣPFCA Tertile 2 vs. 1  | 0.691 | 0.491 | 0.973 | 97  |
| Male | Free  | ΣPFCA Tertile 3 vs. 1  | 0.678 | 0.433 | 1.060 |     |
| Male | Free  | ΣPFSA Tertile 2 vs. 1  | 0.807 | 0.618 | 1.053 | 97  |
| Male | Free  | ΣPFSA Tertile 3 vs. 1  | 0.650 | 0.504 | 0.839 |     |
| Male | Free  | ΣPFAS Tertile 2 vs. 1  | 0.885 | 0.674 | 1.163 | 137 |
| Male | Free  | ΣPFAS Tertile 3 vs. 1  | 0.794 | 0.597 | 1.058 |     |
| Male | Bound | PFDA Tertile 2 vs. 1   | 1.222 | 1.043 | 1.433 | 158 |
| Male | Bound | PFDA Tertile 3 vs. 1   | 1.409 | 1.064 | 1.866 |     |
| Male | Bound | PFDoDA Tertile 2 vs. 1 | 1.321 | 1.149 | 1.520 | 158 |
| Male | Bound | PFDoDA Tertile 3 vs. 1 | 1.210 | 0.995 | 1.471 |     |
| Male | Bound | PFHpA Tertile 2 vs. 1  | 0.977 | 0.666 | 1.434 | 71  |
| Male | Bound | PFHpA Tertile 3 vs. 1  | 1.003 | 0.763 | 1.319 |     |
| Male | Bound | PFNA Tertile 2 vs. 1   | 1.088 | 0.921 | 1.285 | 158 |
| Male | Bound | PFNA Tertile 3 vs. 1   | 0.894 | 0.657 | 1.215 |     |
| Male | Bound | PFOA Tertile 2 vs. 1   | 0.939 | 0.800 | 1.103 | 158 |
| Male | Bound | PFOA Tertile 3 vs. 1   | 0.767 | 0.611 | 0.961 |     |
| Male | Bound | PFTeA Tertile 2 vs. 1  | 1.489 | 1.072 | 2.067 | 63  |
| Male | Bound | PFTeA Tertile 3 vs. 1  | 1.433 | 1.167 | 1.761 |     |

|      |       |                        |       |       |       |     |
|------|-------|------------------------|-------|-------|-------|-----|
| Male | Bound | PFTriA Tertile 2 vs. 1 | 1.148 | 0.735 | 1.793 | 46  |
| Male | Bound | PFTriA Tertile 3 vs. 1 | 1.111 | 0.657 | 1.881 |     |
| Male | Bound | PUnDA Tertile 2 vs. 1  | 1.106 | 0.944 | 1.297 | 158 |
| Male | Bound | PUnDA Tertile 3 vs. 1  | 1.241 | 0.952 | 1.618 |     |
| Male | Bound | PFDS Tertile 2 vs. 1   | 1.191 | 0.942 | 1.507 | 74  |
| Male | Bound | PFDS Tertile 3 vs. 1   | 1.747 | 1.282 | 2.380 |     |
| Male | Bound | PFHxS Tertile 2 vs. 1  | 0.897 | 0.751 | 1.072 | 158 |
| Male | Bound | PFHxS Tertile 3 vs. 1  | 0.893 | 0.728 | 1.094 |     |
| Male | Bound | PFOS Tertile 2 vs. 1   | 1.124 | 0.945 | 1.336 | 145 |
| Male | Bound | PFOS Tertile 2 vs. 2   | 1.034 | 0.839 | 1.273 |     |
| Male | Bound | PFOSA Tertile 2 vs. 1  | 1.120 | 0.926 | 1.355 | 130 |
| Male | Bound | PFOSA Tertile 3 vs. 1  | 0.980 | 0.664 | 1.444 |     |
| Male | Bound | ΣPFCA Tertile 2 vs. 1  | 1.074 | 0.892 | 1.293 | 103 |
| Male | Bound | ΣPFCA Tertile 3 vs. 1  | 1.059 | 0.780 | 1.439 |     |
| Male | Bound | ΣPFSA Tertile 2 vs. 1  | 1.241 | 1.036 | 1.487 | 103 |
| Male | Bound | ΣPFSA Tertile 3 vs. 1  | 1.233 | 1.022 | 1.487 |     |
| Male | Bound | ΣPFAS Tertile 2 vs. 1  | 1.194 | 1.020 | 1.398 | 145 |
| Male | Bound | ΣPFAS Tertile 3 vs. 1  | 1.209 | 1.015 | 1.440 |     |
| Male | Total | PFDA Tertile 2 vs. 1   | 1.260 | 1.040 | 1.526 | 150 |
| Male | Total | PFDA Tertile 3 vs. 1   | 1.562 | 1.191 | 2.048 |     |
| Male | Total | PFDODA Tertile 2 vs. 1 | 1.290 | 1.084 | 1.537 | 150 |
| Male | Total | PFDODA Tertile 3 vs. 1 | 1.219 | 1.015 | 1.463 |     |
| Male | Total | PFHpA Tertile 2 vs. 1  | 1.173 | 0.709 | 1.940 | 67  |
| Male | Total | PFHpA Tertile 3 vs. 1  | 0.930 | 0.746 | 1.160 |     |
| Male | Total | PFNA Tertile 2 vs. 1   | 0.869 | 0.723 | 1.045 | 150 |
| Male | Total | PFNA Tertile 3 vs. 1   | 0.836 | 0.657 | 1.065 |     |
| Male | Total | PFOA Tertile 2 vs. 1   | 0.797 | 0.666 | 0.953 | 150 |
| Male | Total | PFOA Tertile 3 vs. 1   | 0.820 | 0.641 | 1.049 |     |
| Male | Total | PFTeA Tertile 2 vs. 1  | 1.238 | 0.825 | 1.857 | 61  |
| Male | Total | PFTeA Tertile 3 vs. 1  | 0.964 | 0.804 | 1.155 |     |
| Male | Total | PFTriA Tertile 2 vs. 1 | 1.335 | 0.970 | 1.838 | 46  |
| Male | Total | PFTriA Tertile 3 vs. 1 | 1.731 | 1.215 | 2.467 |     |

|          |       |                        |       |       |       |     |
|----------|-------|------------------------|-------|-------|-------|-----|
| Male     | Total | PFUnDA Tertile 2 vs. 1 | 0.973 | 0.802 | 1.181 | 150 |
| Male     | Total | PFUnDA Tertile 3 vs. 1 | 0.973 | 0.739 | 1.281 |     |
| Male     | Total | PFDS Tertile 2 vs. 1   | 0.994 | 0.760 | 1.299 | 70  |
| Male     | Total | PFDS Tertile 3 vs. 1   | 1.341 | 0.928 | 1.937 |     |
| Male     | Total | PFHxS Tertile 2 vs. 1  | 0.844 | 0.709 | 1.005 | 150 |
| Male     | Total | PFHxS Tertile 3 vs. 1  | 0.810 | 0.660 | 0.994 |     |
| Male     | Total | PFOS Tertile 2 vs. 1   | 0.905 | 0.752 | 1.090 | 137 |
| Male     | Total | PFOS Tertile 2 vs. 2   | 0.861 | 0.696 | 1.065 |     |
| Male     | Total | PFOSA Tertile 2 vs. 1  | 0.933 | 0.751 | 1.158 | 123 |
| Male     | Total | PFOSA Tertile 3 vs. 1  | 0.992 | 0.746 | 1.319 |     |
| Male     | Total | ΣPFCA Tertile 2 vs. 1  | 0.797 | 0.634 | 1.003 | 97  |
| Male     | Total | ΣPFCA Tertile 3 vs. 1  | 0.775 | 0.579 | 1.036 |     |
| Male     | Total | ΣPFSA Tertile 2 vs. 1  | 0.923 | 0.774 | 1.100 | 97  |
| Male     | Total | ΣPFSA Tertile 3 vs. 1  | 0.802 | 0.664 | 0.969 |     |
| Male     | Total | ΣPFAS Tertile 2 vs. 1  | 0.988 | 0.829 | 1.179 | 137 |
| Male     | Total | ΣPFAS Tertile 3 vs. 1  | 0.930 | 0.760 | 1.138 |     |
| Juvenile | Free  | PFDA Tertile 2 vs. 1   | 0.801 | 0.464 | 1.381 | 59  |
| Juvenile | Free  | PFDA Tertile 3 vs. 1   | 0.975 | 0.607 | 1.569 |     |
| Juvenile | Free  | PFDoDA Tertile 2 vs. 1 | 0.766 | 0.465 | 1.263 | 59  |
| Juvenile | Free  | PFDoDA Tertile 3 vs. 1 | 0.746 | 0.462 | 1.204 |     |
| Juvenile | Free  | PFHpA Tertile 2 vs. 1  | 0.216 | 0.067 | 0.701 | 20  |
| Juvenile | Free  | PFHpA Tertile 3 vs. 1  | 0.872 | 0.571 | 1.332 |     |
| Juvenile | Free  | PFNA Tertile 2 vs. 1   | 0.819 | 0.486 | 1.379 | 59  |
| Juvenile | Free  | PFNA Tertile 3 vs. 1   | 0.656 | 0.330 | 1.305 |     |
| Juvenile | Free  | PFOA Tertile 2 vs. 1   | 0.685 | 0.432 | 1.086 | 59  |
| Juvenile | Free  | PFOA Tertile 3 vs. 1   | 0.612 | 0.371 | 1.009 |     |
| Juvenile | Free  | PFTeA Tertile 2 vs. 1  | 0.005 | 0.000 | 0.101 | 36  |
| Juvenile | Free  | PFTeA Tertile 3 vs. 1  | 0.506 | 0.301 | 0.851 |     |
| Juvenile | Free  | PFTriA Tertile 2 vs. 1 | 1.119 | 0.590 | 2.123 | 26  |
| Juvenile | Free  | PFTriA Tertile 3 vs. 1 | 1.305 | 0.795 | 2.142 |     |
| Juvenile | Free  | PFUnDA Tertile 2 vs. 1 | 0.678 | 0.407 | 1.129 | 59  |
| Juvenile | Free  | PFUnDA Tertile 3 vs. 1 | 0.723 | 0.439 | 1.189 |     |

|          |       |                        |       |       |        |    |
|----------|-------|------------------------|-------|-------|--------|----|
| Juvenile | Free  | PFDS Tertile 2 vs. 1   | 2.701 | 0.452 | 16.163 | 20 |
| Juvenile | Free  | PFDS Tertile 3 vs. 1   | 2.451 | 0.209 | 28.770 |    |
| Juvenile | Free  | PFHxS Tertile 2 vs. 1  | 0.779 | 0.443 | 1.369  | 59 |
| Juvenile | Free  | PFHxS Tertile 3 vs. 1  | 0.511 | 0.331 | 0.790  |    |
| Juvenile | Free  | PFOS Tertile 2 vs. 1   | 0.950 | 0.594 | 1.520  | 58 |
| Juvenile | Free  | PFOS Tertile 2 vs. 2   | 0.627 | 0.402 | 0.980  |    |
| Juvenile | Free  | PFOSA Tertile 2 vs. 1  | 0.791 | 0.496 | 1.261  | 56 |
| Juvenile | Free  | PFOSA Tertile 3 vs. 1  | 4.397 | 0.446 | 43.359 |    |
| Juvenile | Free  | ΣPFCA Tertile 2 vs. 1  | 0.691 | 0.491 | 0.973  | 51 |
| Juvenile | Free  | ΣPFCA Tertile 3 vs. 1  | 0.678 | 0.433 | 1.060  |    |
| Juvenile | Free  | ΣPFSA Tertile 2 vs. 1  | 0.807 | 0.618 | 1.053  | 51 |
| Juvenile | Free  | ΣPFSA Tertile 3 vs. 1  | 0.650 | 0.504 | 0.839  |    |
| Juvenile | Free  | ΣPFAS Tertile 2 vs. 1  | 0.885 | 0.674 | 1.163  | 58 |
| Juvenile | Free  | ΣPFAS Tertile 3 vs. 1  | 0.794 | 0.597 | 1.058  |    |
| Juvenile | Bound | PFDA Tertile 2 vs. 1   | 1.161 | 0.887 | 1.521  | 62 |
| Juvenile | Bound | PFDA Tertile 3 vs. 1   | 1.093 | 0.795 | 1.502  |    |
| Juvenile | Bound | PFDODA Tertile 2 vs. 1 | 1.025 | 0.828 | 1.268  | 62 |
| Juvenile | Bound | PFDODA Tertile 3 vs. 1 | 1.072 | 0.792 | 1.452  |    |
| Juvenile | Bound | PFHpA Tertile 2 vs. 1  | 0.837 | 0.602 | 1.165  | 22 |
| Juvenile | Bound | PFHpA Tertile 3 vs. 1  | 1.151 | 0.879 | 1.506  |    |
| Juvenile | Bound | PFNA Tertile 2 vs. 1   | 1.219 | 0.866 | 1.715  | 62 |
| Juvenile | Bound | PFNA Tertile 3 vs. 1   | 1.455 | 0.966 | 2.193  |    |
| Juvenile | Bound | PFOA Tertile 2 vs. 1   | 1.032 | 0.769 | 1.384  | 62 |
| Juvenile | Bound | PFOA Tertile 3 vs. 1   | 0.993 | 0.706 | 1.398  |    |
| Juvenile | Bound | PFTeA Tertile 2 vs. 1  | 0.252 | 0.020 | 3.170  | 37 |
| Juvenile | Bound | PFTeA Tertile 3 vs. 1  | 1.324 | 0.848 | 2.068  |    |
| Juvenile | Bound | PFTriA Tertile 2 vs. 1 | 0.922 | 0.620 | 1.370  | 26 |
| Juvenile | Bound | PFTriA Tertile 3 vs. 1 | 0.985 | 0.638 | 1.520  |    |
| Juvenile | Bound | PFUnDA Tertile 2 vs. 1 | 1.317 | 1.023 | 1.695  | 62 |
| Juvenile | Bound | PFUnDA Tertile 3 vs. 1 | 1.191 | 0.841 | 1.686  |    |
| Juvenile | Bound | PFDS Tertile 2 vs. 1   | 0.960 | 0.587 | 1.568  | 22 |
| Juvenile | Bound | PFDS Tertile 3 vs. 1   | 1.098 | 0.535 | 2.251  |    |



|          |       |                        |       |       |       |    |
|----------|-------|------------------------|-------|-------|-------|----|
| Juvenile | Bound | PFHxS Tertile 2 vs. 1  | 1.213 | 0.827 | 1.780 | 62 |
| Juvenile | Bound | PFHxS Tertile 3 vs. 1  | 1.160 | 0.822 | 1.637 |    |
| Juvenile | Bound | PFOS Tertile 2 vs. 1   | 1.396 | 1.084 | 1.799 | 61 |
| Juvenile | Bound | PFOS Tertile 2 vs. 2   | 1.229 | 0.942 | 1.603 |    |
| Juvenile | Bound | PFOSA Tertile 2 vs. 1  | 1.228 | 0.933 | 1.616 | 59 |
| Juvenile | Bound | PFOSA Tertile 3 vs. 1  | 1.680 | 0.895 | 3.153 |    |
| Juvenile | Bound | ΣPFCA Tertile 2 vs. 1  | 1.074 | 0.892 | 1.293 | 53 |
| Juvenile | Bound | ΣPFCA Tertile 3 vs. 1  | 1.059 | 0.780 | 1.439 |    |
| Juvenile | Bound | ΣPFSA Tertile 2 vs. 1  | 1.241 | 1.036 | 1.487 | 53 |
| Juvenile | Bound | ΣPFSA Tertile 3 vs. 1  | 1.233 | 1.022 | 1.487 |    |
| Juvenile | Bound | ΣPFAS Tertile 2 vs. 1  | 1.194 | 1.020 | 1.398 | 61 |
| Juvenile | Bound | ΣPFAS Tertile 3 vs. 1  | 1.209 | 1.015 | 1.440 |    |
| Juvenile | Total | PFDA Tertile 2 vs. 1   | 0.929 | 0.673 | 1.281 | 59 |
| Juvenile | Total | PFDA Tertile 3 vs. 1   | 1.006 | 0.742 | 1.366 |    |
| Juvenile | Total | PFDoDA Tertile 2 vs. 1 | 0.868 | 0.634 | 1.189 | 59 |
| Juvenile | Total | PFDoDA Tertile 3 vs. 1 | 0.892 | 0.680 | 1.171 |    |
| Juvenile | Total | PFHpA Tertile 2 vs. 1  | 0.458 | 0.363 | 0.579 | 20 |
| Juvenile | Total | PFHpA Tertile 3 vs. 1  | 0.906 | 0.796 | 1.032 |    |
| Juvenile | Total | PFNA Tertile 2 vs. 1   | 0.908 | 0.659 | 1.252 | 59 |
| Juvenile | Total | PFNA Tertile 3 vs. 1   | 0.834 | 0.573 | 1.214 |    |
| Juvenile | Total | PFOA Tertile 2 vs. 1   | 0.759 | 0.582 | 0.990 | 59 |
| Juvenile | Total | PFOA Tertile 3 vs. 1   | 0.729 | 0.546 | 0.974 |    |
| Juvenile | Total | PFTeA Tertile 2 vs. 1  | 0.015 | 0.002 | 0.131 | 36 |
| Juvenile | Total | PFTeA Tertile 3 vs. 1  | 0.694 | 0.502 | 0.960 |    |
| Juvenile | Total | PFTriA Tertile 2 vs. 1 | 1.121 | 0.726 | 1.731 | 26 |
| Juvenile | Total | PFTriA Tertile 3 vs. 1 | 1.245 | 0.900 | 1.722 |    |
| Juvenile | Total | PFUnDA Tertile 2 vs. 1 | 0.858 | 0.636 | 1.159 | 59 |
| Juvenile | Total | PFUnDA Tertile 3 vs. 1 | 0.868 | 0.654 | 1.152 |    |
| Juvenile | Total | PFDS Tertile 2 vs. 1   | 0.760 | 0.459 | 1.258 | 20 |
| Juvenile | Total | PFDS Tertile 3 vs. 1   | 0.670 | 0.332 | 1.352 |    |
| Juvenile | Total | PFHxS Tertile 2 vs. 1  | 0.869 | 0.674 | 1.119 | 59 |
| Juvenile | Total | PFHxS Tertile 3 vs. 1  | 0.647 | 0.511 | 0.818 |    |

|          |       |                        |       |       |        |     |
|----------|-------|------------------------|-------|-------|--------|-----|
| Juvenile | Total | PFOS Tertile 2 vs. 1   | 1.081 | 0.826 | 1.415  | 58  |
| Juvenile | Total | PFOS Tertile 2 vs. 2   | 0.767 | 0.584 | 1.007  |     |
| Juvenile | Total | PFOSA Tertile 2 vs. 1  | 0.918 | 0.701 | 1.202  | 56  |
| Juvenile | Total | PFOSA Tertile 3 vs. 1  | 3.245 | 0.886 | 11.883 |     |
| Juvenile | Total | ΣPFCA Tertile 2 vs. 1  | 0.797 | 0.634 | 1.003  | 51  |
| Juvenile | Total | ΣPFCA Tertile 3 vs. 1  | 0.775 | 0.579 | 1.036  |     |
| Juvenile | Total | ΣPFSA Tertile 2 vs. 1  | 0.923 | 0.774 | 1.100  | 51  |
| Juvenile | Total | ΣPFSA Tertile 3 vs. 1  | 0.802 | 0.664 | 0.969  |     |
| Juvenile | Total | ΣPFAS Tertile 2 vs. 1  | 0.988 | 0.829 | 1.179  | 58  |
| Juvenile | Total | ΣPFAS Tertile 3 vs. 1  | 0.930 | 0.760 | 1.138  |     |
| Adult    | Free  | PFDA Tertile 2 vs. 1   | 1.237 | 0.981 | 1.561  | 186 |
| Adult    | Free  | PFDA Tertile 3 vs. 1   | 1.272 | 0.918 | 1.764  |     |
| Adult    | Free  | PFDoDA Tertile 2 vs. 1 | 1.158 | 0.943 | 1.421  | 186 |
| Adult    | Free  | PFDoDA Tertile 3 vs. 1 | 1.010 | 0.797 | 1.280  |     |
| Adult    | Free  | PFHpA Tertile 2 vs. 1  | 1.888 | 0.975 | 3.655  | 78  |
| Adult    | Free  | PFHpA Tertile 3 vs. 1  | 0.813 | 0.450 | 1.469  |     |
| Adult    | Free  | PFNA Tertile 2 vs. 1   | 0.987 | 0.779 | 1.250  | 186 |
| Adult    | Free  | PFNA Tertile 3 vs. 1   | 0.893 | 0.638 | 1.251  |     |
| Adult    | Free  | PFOA Tertile 2 vs. 1   | 0.741 | 0.597 | 0.919  | 186 |
| Adult    | Free  | PFOA Tertile 3 vs. 1   | 0.726 | 0.546 | 0.965  |     |
| Adult    | Free  | PFTeA Tertile 2 vs. 1  | 1.545 | 0.968 | 2.467  | 81  |
| Adult    | Free  | PFTeA Tertile 3 vs. 1  | 1.034 | 0.809 | 1.322  |     |
| Adult    | Free  | PFTriA Tertile 2 vs. 1 | 1.421 | 1.011 | 1.999  | 64  |
| Adult    | Free  | PFTriA Tertile 3 vs. 1 | 1.843 | 1.314 | 2.587  |     |
| Adult    | Free  | PFUnDA Tertile 2 vs. 1 | 0.988 | 0.771 | 1.268  | 186 |
| Adult    | Free  | PFUnDA Tertile 3 vs. 1 | 0.893 | 0.637 | 1.252  |     |
| Adult    | Free  | PFDS Tertile 2 vs. 1   | 0.508 | 0.250 | 1.033  | 81  |
| Adult    | Free  | PFDS Tertile 3 vs. 1   | 0.655 | 0.282 | 1.520  |     |
| Adult    | Free  | PFHxS Tertile 2 vs. 1  | 0.967 | 0.781 | 1.197  | 186 |
| Adult    | Free  | PFHxS Tertile 3 vs. 1  | 0.885 | 0.717 | 1.092  |     |
| Adult    | Free  | PFOS Tertile 2 vs. 1   | 0.903 | 0.693 | 1.177  | 164 |
| Adult    | Free  | PFOS Tertile 2 vs. 2   | 0.835 | 0.631 | 1.105  |     |

|       |       |                        |       |       |       |     |
|-------|-------|------------------------|-------|-------|-------|-----|
| Adult | Free  | PFOSA Tertile 2 vs. 1  | 0.796 | 0.592 | 1.070 | 156 |
| Adult | Free  | PFOSA Tertile 3 vs. 1  | 0.792 | 0.554 | 1.134 |     |
| Adult | Free  | ΣPFCA Tertile 2 vs. 1  | 0.691 | 0.491 | 0.973 | 122 |
| Adult | Free  | ΣPFCA Tertile 3 vs. 1  | 0.678 | 0.433 | 1.060 |     |
| Adult | Free  | ΣPFSA Tertile 2 vs. 1  | 0.807 | 0.618 | 1.053 | 122 |
| Adult | Free  | ΣPFSA Tertile 3 vs. 1  | 0.650 | 0.504 | 0.839 |     |
| Adult | Free  | ΣPFAS Tertile 2 vs. 1  | 0.885 | 0.674 | 1.163 | 164 |
| Adult | Free  | ΣPFAS Tertile 3 vs. 1  | 0.794 | 0.597 | 1.058 |     |
| Adult | Bound | PFDA Tertile 2 vs. 1   | 1.321 | 1.086 | 1.607 | 192 |
| Adult | Bound | PFDA Tertile 3 vs. 1   | 1.434 | 1.042 | 1.973 |     |
| Adult | Bound | PFDODA Tertile 2 vs. 1 | 1.460 | 1.257 | 1.696 | 192 |
| Adult | Bound | PFDODA Tertile 3 vs. 1 | 1.384 | 1.141 | 1.679 |     |
| Adult | Bound | PFHpA Tertile 2 vs. 1  | 0.988 | 0.748 | 1.306 | 81  |
| Adult | Bound | PFHpA Tertile 3 vs. 1  | 0.900 | 0.650 | 1.244 |     |
| Adult | Bound | PFNA Tertile 2 vs. 1   | 1.056 | 0.889 | 1.253 | 192 |
| Adult | Bound | PFNA Tertile 3 vs. 1   | 1.046 | 0.789 | 1.388 |     |
| Adult | Bound | PFOA Tertile 2 vs. 1   | 1.012 | 0.850 | 1.206 | 192 |
| Adult | Bound | PFOA Tertile 3 vs. 1   | 0.980 | 0.793 | 1.211 |     |
| Adult | Bound | PFTeA Tertile 2 vs. 1  | 1.243 | 0.908 | 1.702 | 83  |
| Adult | Bound | PFTeA Tertile 3 vs. 1  | 1.059 | 0.839 | 1.337 |     |
| Adult | Bound | PFTriA Tertile 2 vs. 1 | 1.018 | 0.705 | 1.469 | 65  |
| Adult | Bound | PFTriA Tertile 3 vs. 1 | 1.136 | 0.697 | 1.850 |     |
| Adult | Bound | PFUnDA Tertile 2 vs. 1 | 1.257 | 1.031 | 1.534 | 192 |
| Adult | Bound | PFUnDA Tertile 3 vs. 1 | 1.382 | 1.031 | 1.853 |     |
| Adult | Bound | PFDS Tertile 2 vs. 1   | 1.239 | 0.974 | 1.577 | 84  |
| Adult | Bound | PFDS Tertile 3 vs. 1   | 1.580 | 1.205 | 2.073 |     |
| Adult | Bound | PFHxS Tertile 2 vs. 1  | 0.921 | 0.786 | 1.080 | 192 |
| Adult | Bound | PFHxS Tertile 3 vs. 1  | 1.087 | 0.907 | 1.303 |     |
| Adult | Bound | PFOS Tertile 2 vs. 1   | 1.102 | 0.899 | 1.350 | 169 |
| Adult | Bound | PFOS Tertile 2 vs. 2   | 1.196 | 0.967 | 1.479 |     |
| Adult | Bound | PFOSA Tertile 2 vs. 1  | 1.140 | 0.920 | 1.412 | 161 |
| Adult | Bound | PFOSA Tertile 3 vs. 1  | 1.013 | 0.702 | 1.463 |     |

|       |       |                        |       |       |       |     |
|-------|-------|------------------------|-------|-------|-------|-----|
| Adult | Bound | ΣPFCA Tertile 2 vs. 1  | 1.074 | 0.892 | 1.293 | 126 |
| Adult | Bound | ΣPFCA Tertile 3 vs. 1  | 1.059 | 0.780 | 1.439 |     |
| Adult | Bound | ΣPFSA Tertile 2 vs. 1  | 1.241 | 1.036 | 1.487 | 126 |
| Adult | Bound | ΣPFSA Tertile 3 vs. 1  | 1.233 | 1.022 | 1.487 |     |
| Adult | Bound | ΣPFAS Tertile 2 vs. 1  | 1.194 | 1.020 | 1.398 | 169 |
| Adult | Bound | ΣPFAS Tertile 3 vs. 1  | 1.209 | 1.015 | 1.440 |     |
| Adult | Total | PFDA Tertile 2 vs. 1   | 1.270 | 1.075 | 1.501 | 186 |
| Adult | Total | PFDA Tertile 3 vs. 1   | 1.320 | 1.045 | 1.667 |     |
| Adult | Total | PFDODA Tertile 2 vs. 1 | 1.223 | 1.061 | 1.411 | 186 |
| Adult | Total | PFDODA Tertile 3 vs. 1 | 1.162 | 0.981 | 1.377 |     |
| Adult | Total | PFHpA Tertile 2 vs. 1  | 1.353 | 1.077 | 1.700 | 78  |
| Adult | Total | PFHpA Tertile 3 vs. 1  | 0.924 | 0.731 | 1.168 |     |
| Adult | Total | PFNA Tertile 2 vs. 1   | 1.008 | 0.853 | 1.191 | 186 |
| Adult | Total | PFNA Tertile 3 vs. 1   | 0.961 | 0.767 | 1.204 |     |
| Adult | Total | PFOA Tertile 2 vs. 1   | 0.853 | 0.729 | 1.000 | 186 |
| Adult | Total | PFOA Tertile 3 vs. 1   | 0.795 | 0.652 | 0.970 |     |
| Adult | Total | PFTeA Tertile 2 vs. 1  | 1.635 | 1.214 | 2.202 | 81  |
| Adult | Total | PFTeA Tertile 3 vs. 1  | 1.060 | 0.898 | 1.251 |     |
| Adult | Total | PFTriA Tertile 2 vs. 1 | 1.162 | 0.902 | 1.496 | 64  |
| Adult | Total | PFTriA Tertile 3 vs. 1 | 1.479 | 1.107 | 1.976 |     |
| Adult | Total | PFUnDA Tertile 2 vs. 1 | 1.031 | 0.860 | 1.235 | 186 |
| Adult | Total | PFUnDA Tertile 3 vs. 1 | 0.993 | 0.769 | 1.282 |     |
| Adult | Total | PFDS Tertile 2 vs. 1   | 0.950 | 0.743 | 1.215 | 81  |
| Adult | Total | PFDS Tertile 3 vs. 1   | 1.162 | 0.771 | 1.751 |     |
| Adult | Total | PFHxS Tertile 2 vs. 1  | 0.941 | 0.816 | 1.085 | 186 |
| Adult | Total | PFHxS Tertile 3 vs. 1  | 0.925 | 0.795 | 1.076 |     |
| Adult | Total | PFOS Tertile 2 vs. 1   | 0.992 | 0.838 | 1.174 | 164 |
| Adult | Total | PFOS Tertile 2 vs. 2   | 0.950 | 0.775 | 1.164 |     |
| Adult | Total | PFOSA Tertile 2 vs. 1  | 0.898 | 0.727 | 1.110 | 156 |
| Adult | Total | PFOSA Tertile 3 vs. 1  | 0.871 | 0.663 | 1.143 |     |
| Adult | Total | ΣPFCA Tertile 2 vs. 1  | 0.797 | 0.634 | 1.003 | 122 |
| Adult | Total | ΣPFCA Tertile 3 vs. 1  | 0.775 | 0.579 | 1.036 |     |

|       |       |                       |       |       |       |     |
|-------|-------|-----------------------|-------|-------|-------|-----|
| Adult | Total | ΣPFSA Tertile 2 vs. 1 | 0.923 | 0.774 | 1.100 | 122 |
| Adult | Total | ΣPFSA Tertile 3 vs. 1 | 0.802 | 0.664 | 0.969 |     |
| Adult | Total | ΣPFAS Tertile 2 vs. 1 | 0.988 | 0.829 | 1.179 | 164 |
| Adult | Total | ΣPFAS Tertile 3 vs. 1 | 0.930 | 0.760 | 1.138 |     |

**Table S7.** Regression coefficients, 95% confidence intervals, and sample sizes (n) for each unadjusted model.

| Stratification | Cortisol | PFAS Tertile           | Quantile Ratio | 95% Confidence Interval |       | n   |
|----------------|----------|------------------------|----------------|-------------------------|-------|-----|
| None           | Free     | PFDA Tertile 2 vs. 1   | 1.291          | 1.032                   | 1.615 | 247 |
| None           | Free     | PFDA Tertile 3 vs. 1   | 1.038          | 0.850                   | 1.268 |     |
| None           | Free     | PFDODA Tertile 2 vs. 1 | 1.181          | 0.951                   | 1.466 | 247 |
| None           | Free     | PFDODA Tertile 3 vs. 1 | 0.917          | 0.748                   | 1.125 |     |
| None           | Free     | PFHpA Tertile 2 vs. 1  | 1.209          | 0.633                   | 2.307 | 100 |
| None           | Free     | PFHpA Tertile 3 vs. 1  | 0.775          | 0.488                   | 1.233 |     |
| None           | Free     | PFNA Tertile 2 vs. 1   | 0.940          | 0.756                   | 1.169 | 247 |
| None           | Free     | PFNA Tertile 3 vs. 1   | 0.807          | 0.650                   | 1.001 |     |
| None           | Free     | PFOA Tertile 2 vs. 1   | 0.664          | 0.546                   | 0.807 | 247 |
| None           | Free     | PFOA Tertile 3 vs. 1   | 0.738          | 0.604                   | 0.902 |     |
| None           | Free     | PFTeA Tertile 2 vs. 1  | 0.532          | 0.372                   | 0.760 | 119 |
| None           | Free     | PFTeA Tertile 3 vs. 1  | 0.743          | 0.603                   | 0.915 |     |
| None           | Free     | PFTriA Tertile 2 vs. 1 | 0.907          | 0.696                   | 1.183 | 92  |
| None           | Free     | PFTriA Tertile 3 vs. 1 | 0.837          | 0.582                   | 1.203 |     |
| None           | Free     | PFUnDA Tertile 2 vs. 1 | 1.030          | 0.820                   | 1.293 | 247 |
| None           | Free     | PFUnDA Tertile 3 vs. 1 | 0.953          | 0.768                   | 1.183 |     |
| None           | Free     | PFDS Tertile 2 vs. 1   | 0.716          | 0.402                   | 1.274 | 103 |
| None           | Free     | PFDS Tertile 3 vs. 1   | 1.371          | 0.869                   | 2.164 |     |
| None           | Free     | PFHxS Tertile 2 vs. 1  | 0.826          | 0.665                   | 1.027 | 247 |
| None           | Free     | PFHxS Tertile 3 vs. 1  | 0.808          | 0.662                   | 0.985 |     |
| None           | Free     | PFOS Tertile 2 vs. 1   | 0.905          | 0.729                   | 1.125 | 222 |
| None           | Free     | PFOS Tertile 2 vs. 2   | 0.744          | 0.614                   | 0.901 |     |
| None           | Free     | PFOSA Tertile 2 vs. 1  | 0.714          | 0.566                   | 0.900 | 214 |
| None           | Free     | PFOSA Tertile 3 vs. 1  | 0.780          | 0.640                   | 0.950 |     |

|      |       |                        |       |       |       |     |
|------|-------|------------------------|-------|-------|-------|-----|
| None | Free  | ΣPFCA Tertile 2 vs. 1  | 0.698 | 0.561 | 0.868 | 173 |
| None | Free  | ΣPFCA Tertile 3 vs. 1  | 0.668 | 0.552 | 0.808 |     |
| None | Free  | ΣPFSA Tertile 2 vs. 1  | 0.821 | 0.657 | 1.026 | 173 |
| None | Free  | ΣPFSA Tertile 3 vs. 1  | 0.636 | 0.532 | 0.760 |     |
| None | Free  | ΣPFAS Tertile 2 vs. 1  | 0.920 | 0.738 | 1.148 | 222 |
| None | Free  | ΣPFAS Tertile 3 vs. 1  | 0.789 | 0.648 | 0.961 |     |
| None | Bound | PFDA Tertile 2 vs. 1   | 1.030 | 0.894 | 1.187 | 257 |
| None | Bound | PFDA Tertile 3 vs. 1   | 0.672 | 0.575 | 0.785 |     |
| None | Bound | PFDODA Tertile 2 vs. 1 | 1.178 | 1.020 | 1.361 | 257 |
| None | Bound | PFDODA Tertile 3 vs. 1 | 0.786 | 0.671 | 0.921 |     |
| None | Bound | PFHpA Tertile 2 vs. 1  | 1.059 | 0.817 | 1.372 | 106 |
| None | Bound | PFHpA Tertile 3 vs. 1  | 0.768 | 0.621 | 0.949 |     |
| None | Bound | PFNA Tertile 2 vs. 1   | 0.954 | 0.821 | 1.108 | 257 |
| None | Bound | PFNA Tertile 3 vs. 1   | 0.677 | 0.581 | 0.790 |     |
| None | Bound | PFOA Tertile 2 vs. 1   | 0.899 | 0.770 | 1.049 | 257 |
| None | Bound | PFOA Tertile 3 vs. 1   | 0.692 | 0.592 | 0.809 |     |
| None | Bound | PFTeA Tertile 2 vs. 1  | 1.032 | 0.800 | 1.332 | 123 |
| None | Bound | PFTeA Tertile 3 vs. 1  | 1.070 | 0.873 | 1.311 |     |
| None | Bound | PFTriA Tertile 2 vs. 1 | 0.721 | 0.562 | 0.926 | 94  |
| None | Bound | PFTriA Tertile 3 vs. 1 | 0.731 | 0.580 | 0.921 |     |
| None | Bound | PFUnDA Tertile 2 vs. 1 | 0.969 | 0.837 | 1.123 | 257 |
| None | Bound | PFUnDA Tertile 3 vs. 1 | 0.698 | 0.596 | 0.818 |     |
| None | Bound | PFDS Tertile 2 vs. 1   | 0.967 | 0.776 | 1.205 | 109 |
| None | Bound | PFDS Tertile 3 vs. 1   | 0.812 | 0.650 | 1.015 |     |
| None | Bound | PFHxS Tertile 2 vs. 1  | 0.961 | 0.814 | 1.133 | 257 |
| None | Bound | PFHxS Tertile 3 vs. 1  | 0.958 | 0.811 | 1.130 |     |
| None | Bound | PFOS Tertile 2 vs. 1   | 0.891 | 0.749 | 1.059 | 230 |
| None | Bound | PFOS Tertile 2 vs. 2   | 0.831 | 0.707 | 0.975 |     |
| None | Bound | PFOSA Tertile 2 vs. 1  | 0.933 | 0.800 | 1.089 | 223 |
| None | Bound | PFOSA Tertile 3 vs. 1  | 0.617 | 0.521 | 0.731 |     |
| None | Bound | ΣPFCA Tertile 2 vs. 1  | 0.854 | 0.707 | 1.031 | 179 |
| None | Bound | ΣPFCA Tertile 3 vs. 1  | 0.654 | 0.545 | 0.783 |     |

|      |       |                        |       |       |       |     |
|------|-------|------------------------|-------|-------|-------|-----|
| None | Bound | ΣPFSA Tertile 2 vs. 1  | 1.000 | 0.819 | 1.221 | 179 |
| None | Bound | ΣPFSA Tertile 3 vs. 1  | 0.907 | 0.748 | 1.099 |     |
| None | Bound | ΣPFAS Tertile 2 vs. 1  | 0.891 | 0.750 | 1.059 | 230 |
| None | Bound | ΣPFAS Tertile 3 vs. 1  | 0.831 | 0.708 | 0.976 |     |
| None | Total | PFDA Tertile 2 vs. 1   | 1.254 | 1.076 | 1.462 | 247 |
| None | Total | PFDA Tertile 3 vs. 1   | 0.932 | 0.822 | 1.058 |     |
| None | Total | PFDoDA Tertile 2 vs. 1 | 1.204 | 1.030 | 1.408 | 247 |
| None | Total | PFDoDA Tertile 3 vs. 1 | 0.906 | 0.791 | 1.038 |     |
| None | Total | PFHpA Tertile 2 vs. 1  | 1.156 | 0.925 | 1.445 | 100 |
| None | Total | PFHpA Tertile 3 vs. 1  | 0.810 | 0.641 | 1.023 |     |
| None | Total | PFNA Tertile 2 vs. 1   | 0.942 | 0.805 | 1.102 | 247 |
| None | Total | PFNA Tertile 3 vs. 1   | 0.764 | 0.656 | 0.891 |     |
| None | Total | PFOA Tertile 2 vs. 1   | 0.755 | 0.652 | 0.874 | 247 |
| None | Total | PFOA Tertile 3 vs. 1   | 0.736 | 0.635 | 0.853 |     |
| None | Total | PFTeA Tertile 2 vs. 1  | 0.692 | 0.520 | 0.920 | 119 |
| None | Total | PFTeA Tertile 3 vs. 1  | 0.867 | 0.730 | 1.029 |     |
| None | Total | PFTriA Tertile 2 vs. 1 | 0.838 | 0.698 | 1.006 | 92  |
| None | Total | PFTriA Tertile 3 vs. 1 | 0.846 | 0.655 | 1.091 |     |
| None | Total | PFUnDA Tertile 2 vs. 1 | 1.008 | 0.854 | 1.191 | 247 |
| None | Total | PFUnDA Tertile 3 vs. 1 | 0.865 | 0.738 | 1.014 |     |
| None | Total | PFDS Tertile 2 vs. 1   | 0.985 | 0.777 | 1.248 | 103 |
| None | Total | PFDS Tertile 3 vs. 1   | 1.114 | 0.902 | 1.375 |     |
| None | Total | PFHxS Tertile 2 vs. 1  | 0.860 | 0.734 | 1.008 | 247 |
| None | Total | PFHxS Tertile 3 vs. 1  | 0.838 | 0.719 | 0.978 |     |
| None | Total | PFOS Tertile 2 vs. 1   | 0.921 | 0.787 | 1.078 | 222 |
| None | Total | PFOS Tertile 2 vs. 2   | 0.768 | 0.659 | 0.896 |     |
| None | Total | PFOSA Tertile 2 vs. 1  | 0.802 | 0.680 | 0.947 | 214 |
| None | Total | PFOSA Tertile 3 vs. 1  | 0.745 | 0.639 | 0.869 |     |
| None | Total | ΣPFCA Tertile 2 vs. 1  | 0.752 | 0.636 | 0.889 | 173 |
| None | Total | ΣPFCA Tertile 3 vs. 1  | 0.666 | 0.578 | 0.768 |     |
| None | Total | ΣPFSA Tertile 2 vs. 1  | 0.868 | 0.731 | 1.031 | 173 |
| None | Total | ΣPFSA Tertile 3 vs. 1  | 0.708 | 0.601 | 0.834 |     |

|        |       |                        |       |       |       |     |
|--------|-------|------------------------|-------|-------|-------|-----|
| None   | Total | ΣPFAS Tertile 2 vs. 1  | 0.928 | 0.790 | 1.091 | 222 |
| None   | Total | ΣPFAS Tertile 3 vs. 1  | 0.798 | 0.684 | 0.931 |     |
| Female | Free  | PFDA Tertile 2 vs. 1   | 0.942 | 0.645 | 1.375 | 81  |
| Female | Free  | PFDA Tertile 3 vs. 1   | 0.775 | 0.568 | 1.059 |     |
| Female | Free  | PFDODA Tertile 2 vs. 1 | 0.762 | 0.542 | 1.070 | 81  |
| Female | Free  | PFDODA Tertile 3 vs. 1 | 0.687 | 0.503 | 0.938 |     |
| Female | Free  | PFHpA Tertile 2 vs. 1  | 1.445 | 0.717 | 2.912 | 23  |
| Female | Free  | PFHpA Tertile 3 vs. 1  | 0.583 | 0.323 | 1.051 |     |
| Female | Free  | PFNA Tertile 2 vs. 1   | 0.855 | 0.611 | 1.196 | 81  |
| Female | Free  | PFNA Tertile 3 vs. 1   | 0.726 | 0.527 | 1.000 |     |
| Female | Free  | PFOA Tertile 2 vs. 1   | 0.579 | 0.434 | 0.774 | 81  |
| Female | Free  | PFOA Tertile 3 vs. 1   | 0.627 | 0.480 | 0.820 |     |
| Female | Free  | PFTeA Tertile 2 vs. 1  | 0.630 | 0.398 | 0.998 | 52  |
| Female | Free  | PFTeA Tertile 3 vs. 1  | 0.788 | 0.572 | 1.086 |     |
| Female | Free  | PFTriA Tertile 2 vs. 1 | 1.070 | 0.729 | 1.571 | 41  |
| Female | Free  | PFTriA Tertile 3 vs. 1 | 0.791 | 0.467 | 1.339 |     |
| Female | Free  | PFUnDA Tertile 2 vs. 1 | 0.866 | 0.569 | 1.318 | 81  |
| Female | Free  | PFUnDA Tertile 3 vs. 1 | 0.819 | 0.539 | 1.243 |     |
| Female | Free  | PFDS Tertile 2 vs. 1   | 0.586 | 0.286 | 1.201 | 23  |
| Female | Free  | PFDS Tertile 3 vs. 1   | 0.936 | 0.590 | 1.486 |     |
| Female | Free  | PFHxS Tertile 2 vs. 1  | 1.240 | 0.857 | 1.794 | 81  |
| Female | Free  | PFHxS Tertile 3 vs. 1  | 0.810 | 0.628 | 1.045 |     |
| Female | Free  | PFOS Tertile 2 vs. 1   | 1.054 | 0.759 | 1.463 | 72  |
| Female | Free  | PFOS Tertile 2 vs. 2   | 0.631 | 0.467 | 0.853 |     |
| Female | Free  | PFOSA Tertile 2 vs. 1  | 0.643 | 0.443 | 0.933 | 80  |
| Female | Free  | PFOSA Tertile 3 vs. 1  | 0.703 | 0.533 | 0.926 |     |
| Female | Free  | ΣPFCA Tertile 2 vs. 1  | 0.659 | 0.497 | 0.874 | 69  |
| Female | Free  | ΣPFCA Tertile 3 vs. 1  | 0.691 | 0.512 | 0.934 |     |
| Female | Free  | ΣPFSA Tertile 2 vs. 1  | 1.110 | 0.817 | 1.508 | 69  |
| Female | Free  | ΣPFSA Tertile 3 vs. 1  | 0.646 | 0.500 | 0.835 |     |
| Female | Free  | ΣPFAS Tertile 2 vs. 1  | 1.026 | 0.732 | 1.438 | 72  |
| Female | Free  | ΣPFAS Tertile 3 vs. 1  | 0.678 | 0.493 | 0.932 |     |



|        |       |                        |       |       |       |    |
|--------|-------|------------------------|-------|-------|-------|----|
| Female | Bound | PFDA Tertile 2 vs. 1   | 1.207 | 0.824 | 1.767 | 81 |
| Female | Bound | PFDA Tertile 3 vs. 1   | 0.622 | 0.425 | 0.911 |    |
| Female | Bound | PFDODA Tertile 2 vs. 1 | 1.125 | 0.783 | 1.616 | 81 |
| Female | Bound | PFDODA Tertile 3 vs. 1 | 0.761 | 0.536 | 1.081 |    |
| Female | Bound | PFHpA Tertile 2 vs. 1  | 1.378 | 0.707 | 2.684 | 23 |
| Female | Bound | PFHpA Tertile 3 vs. 1  | 0.946 | 0.579 | 1.543 |    |
| Female | Bound | PFNA Tertile 2 vs. 1   | 0.786 | 0.557 | 1.109 | 81 |
| Female | Bound | PFNA Tertile 3 vs. 1   | 0.653 | 0.473 | 0.902 |    |
| Female | Bound | PFOA Tertile 2 vs. 1   | 0.921 | 0.648 | 1.308 | 81 |
| Female | Bound | PFOA Tertile 3 vs. 1   | 0.760 | 0.547 | 1.057 |    |
| Female | Bound | PFTeA Tertile 2 vs. 1  | 1.134 | 0.775 | 1.658 | 52 |
| Female | Bound | PFTeA Tertile 3 vs. 1  | 0.829 | 0.599 | 1.147 |    |
| Female | Bound | PFTriA Tertile 2 vs. 1 | 0.546 | 0.386 | 0.773 | 41 |
| Female | Bound | PFTriA Tertile 3 vs. 1 | 0.688 | 0.473 | 1.001 |    |
| Female | Bound | PFUnDA Tertile 2 vs. 1 | 1.190 | 0.698 | 2.030 | 81 |
| Female | Bound | PFUnDA Tertile 3 vs. 1 | 0.754 | 0.442 | 1.287 |    |
| Female | Bound | PFDS Tertile 2 vs. 1   | 1.223 | 0.760 | 1.968 | 23 |
| Female | Bound | PFDS Tertile 3 vs. 1   | 0.771 | 0.488 | 1.219 |    |
| Female | Bound | PFHxS Tertile 2 vs. 1  | 0.975 | 0.696 | 1.364 | 81 |
| Female | Bound | PFHxS Tertile 3 vs. 1  | 1.170 | 0.867 | 1.579 |    |
| Female | Bound | PFOS Tertile 2 vs. 1   | 0.818 | 0.525 | 1.275 | 72 |
| Female | Bound | PFOS Tertile 2 vs. 2   | 0.920 | 0.604 | 1.401 |    |
| Female | Bound | PFOSA Tertile 2 vs. 1  | 1.045 | 0.747 | 1.462 | 80 |
| Female | Bound | PFOSA Tertile 3 vs. 1  | 0.575 | 0.410 | 0.808 |    |
| Female | Bound | ΣPFCA Tertile 2 vs. 1  | 0.810 | 0.564 | 1.163 | 69 |
| Female | Bound | ΣPFCA Tertile 3 vs. 1  | 0.602 | 0.435 | 0.832 |    |
| Female | Bound | ΣPFSA Tertile 2 vs. 1  | 1.172 | 0.809 | 1.697 | 69 |
| Female | Bound | ΣPFSA Tertile 3 vs. 1  | 1.084 | 0.752 | 1.561 |    |
| Female | Bound | ΣPFAS Tertile 2 vs. 1  | 0.827 | 0.528 | 1.295 | 72 |
| Female | Bound | ΣPFAS Tertile 3 vs. 1  | 0.911 | 0.599 | 1.384 |    |
| Female | Total | PFDA Tertile 2 vs. 1   | 1.014 | 0.787 | 1.306 | 81 |
| Female | Total | PFDA Tertile 3 vs. 1   | 0.729 | 0.588 | 0.904 |    |

|        |       |                        |       |       |       |     |
|--------|-------|------------------------|-------|-------|-------|-----|
| Female | Total | PFDODA Tertile 2 vs. 1 | 0.856 | 0.666 | 1.102 | 81  |
| Female | Total | PFDODA Tertile 3 vs. 1 | 0.708 | 0.565 | 0.888 |     |
| Female | Total | PFHpA Tertile 2 vs. 1  | 1.359 | 0.925 | 1.999 | 23  |
| Female | Total | PFHpA Tertile 3 vs. 1  | 0.718 | 0.511 | 1.008 |     |
| Female | Total | PFNA Tertile 2 vs. 1   | 0.883 | 0.688 | 1.133 | 81  |
| Female | Total | PFNA Tertile 3 vs. 1   | 0.715 | 0.577 | 0.886 |     |
| Female | Total | PFOA Tertile 2 vs. 1   | 0.683 | 0.543 | 0.860 | 81  |
| Female | Total | PFOA Tertile 3 vs. 1   | 0.664 | 0.548 | 0.805 |     |
| Female | Total | PFTeA Tertile 2 vs. 1  | 0.825 | 0.571 | 1.192 | 52  |
| Female | Total | PFTeA Tertile 3 vs. 1  | 0.823 | 0.637 | 1.065 |     |
| Female | Total | PFTriA Tertile 2 vs. 1 | 0.894 | 0.680 | 1.176 | 41  |
| Female | Total | PFTriA Tertile 3 vs. 1 | 0.817 | 0.583 | 1.145 |     |
| Female | Total | PFUnDA Tertile 2 vs. 1 | 0.928 | 0.695 | 1.238 | 81  |
| Female | Total | PFUnDA Tertile 3 vs. 1 | 0.789 | 0.584 | 1.066 |     |
| Female | Total | PFDS Tertile 2 vs. 1   | 1.191 | 0.836 | 1.698 | 23  |
| Female | Total | PFDS Tertile 3 vs. 1   | 1.059 | 0.803 | 1.396 |     |
| Female | Total | PFHxS Tertile 2 vs. 1  | 1.183 | 0.886 | 1.579 | 81  |
| Female | Total | PFHxS Tertile 3 vs. 1  | 0.893 | 0.735 | 1.087 |     |
| Female | Total | PFOS Tertile 2 vs. 1   | 1.045 | 0.818 | 1.336 | 72  |
| Female | Total | PFOS Tertile 2 vs. 2   | 0.709 | 0.566 | 0.887 |     |
| Female | Total | PFOSA Tertile 2 vs. 1  | 0.778 | 0.601 | 1.007 | 80  |
| Female | Total | PFOSA Tertile 3 vs. 1  | 0.673 | 0.554 | 0.817 |     |
| Female | Total | ΣPFCA Tertile 2 vs. 1  | 0.696 | 0.564 | 0.860 | 69  |
| Female | Total | ΣPFCA Tertile 3 vs. 1  | 0.666 | 0.537 | 0.825 |     |
| Female | Total | ΣPFSA Tertile 2 vs. 1  | 1.130 | 0.889 | 1.435 | 69  |
| Female | Total | ΣPFSA Tertile 3 vs. 1  | 0.712 | 0.587 | 0.865 |     |
| Female | Total | ΣPFAS Tertile 2 vs. 1  | 1.030 | 0.800 | 1.325 | 72  |
| Female | Total | ΣPFAS Tertile 3 vs. 1  | 0.740 | 0.589 | 0.930 |     |
| Male   | Free  | PFDA Tertile 2 vs. 1   | 1.445 | 1.105 | 1.889 | 164 |
| Male   | Free  | PFDA Tertile 3 vs. 1   | 1.145 | 0.886 | 1.480 |     |
| Male   | Free  | PFDODA Tertile 2 vs. 1 | 1.415 | 1.093 | 1.831 | 164 |
| Male   | Free  | PFDODA Tertile 3 vs. 1 | 1.017 | 0.783 | 1.322 |     |

|      |       |                        |       |       |       |     |
|------|-------|------------------------|-------|-------|-------|-----|
| Male | Free  | PFHpA Tertile 2 vs. 1  | 1.135 | 0.532 | 2.421 | 75  |
| Male | Free  | PFHpA Tertile 3 vs. 1  | 0.816 | 0.439 | 1.517 |     |
| Male | Free  | PFNA Tertile 2 vs. 1   | 0.983 | 0.745 | 1.296 | 164 |
| Male | Free  | PFNA Tertile 3 vs. 1   | 0.849 | 0.640 | 1.128 |     |
| Male | Free  | PFOA Tertile 2 vs. 1   | 0.720 | 0.557 | 0.930 | 164 |
| Male | Free  | PFOA Tertile 3 vs. 1   | 0.820 | 0.623 | 1.078 |     |
| Male | Free  | PFTeA Tertile 2 vs. 1  | 0.448 | 0.260 | 0.771 | 65  |
| Male | Free  | PFTeA Tertile 3 vs. 1  | 0.742 | 0.568 | 0.969 |     |
| Male | Free  | PFTriA Tertile 2 vs. 1 | 0.769 | 0.526 | 1.126 | 49  |
| Male | Free  | PFTriA Tertile 3 vs. 1 | 0.898 | 0.558 | 1.445 |     |
| Male | Free  | PFUnDA Tertile 2 vs. 1 | 1.048 | 0.789 | 1.392 | 164 |
| Male | Free  | PFUnDA Tertile 3 vs. 1 | 0.950 | 0.737 | 1.224 |     |
| Male | Free  | PFDS Tertile 2 vs. 1   | 0.646 | 0.327 | 1.275 | 78  |
| Male | Free  | PFDS Tertile 3 vs. 1   | 1.400 | 0.806 | 2.431 |     |
| Male | Free  | PFHxS Tertile 2 vs. 1  | 0.745 | 0.572 | 0.970 | 164 |
| Male | Free  | PFHxS Tertile 3 vs. 1  | 0.819 | 0.617 | 1.087 |     |
| Male | Free  | PFOS Tertile 2 vs. 1   | 0.773 | 0.591 | 1.011 | 150 |
| Male | Free  | PFOS Tertile 2 vs. 2   | 0.799 | 0.627 | 1.018 |     |
| Male | Free  | PFOSA Tertile 2 vs. 1  | 0.764 | 0.571 | 1.023 | 132 |
| Male | Free  | PFOSA Tertile 3 vs. 1  | 0.813 | 0.620 | 1.067 |     |
| Male | Free  | ΣPFCA Tertile 2 vs. 1  | 0.718 | 0.534 | 0.965 | 104 |
| Male | Free  | ΣPFCA Tertile 3 vs. 1  | 0.641 | 0.507 | 0.812 |     |
| Male | Free  | ΣPFSA Tertile 2 vs. 1  | 0.657 | 0.490 | 0.880 | 104 |
| Male | Free  | ΣPFSA Tertile 3 vs. 1  | 0.646 | 0.512 | 0.816 |     |
| Male | Free  | ΣPFAS Tertile 2 vs. 1  | 0.820 | 0.622 | 1.082 | 150 |
| Male | Free  | ΣPFAS Tertile 3 vs. 1  | 0.840 | 0.660 | 1.070 |     |
| Male | Bound | PFDA Tertile 2 vs. 1   | 0.990 | 0.847 | 1.157 | 173 |
| Male | Bound | PFDA Tertile 3 vs. 1   | 0.796 | 0.660 | 0.960 |     |
| Male | Bound | PFDoDA Tertile 2 vs. 1 | 1.237 | 1.068 | 1.433 | 173 |
| Male | Bound | PFDoDA Tertile 3 vs. 1 | 0.870 | 0.722 | 1.049 |     |
| Male | Bound | PFHpA Tertile 2 vs. 1  | 1.006 | 0.760 | 1.331 | 80  |
| Male | Bound | PFHpA Tertile 3 vs. 1  | 0.782 | 0.607 | 1.008 |     |

|      |       |                        |       |       |       |     |
|------|-------|------------------------|-------|-------|-------|-----|
| Male | Bound | PFNA Tertile 2 vs. 1   | 1.043 | 0.896 | 1.215 | 173 |
| Male | Bound | PFNA Tertile 3 vs. 1   | 0.719 | 0.601 | 0.860 |     |
| Male | Bound | PFOA Tertile 2 vs. 1   | 0.905 | 0.774 | 1.059 | 173 |
| Male | Bound | PFOA Tertile 3 vs. 1   | 0.696 | 0.585 | 0.829 |     |
| Male | Bound | PFTeA Tertile 2 vs. 1  | 0.943 | 0.673 | 1.322 | 68  |
| Male | Bound | PFTeA Tertile 3 vs. 1  | 1.310 | 1.032 | 1.663 |     |
| Male | Bound | PFTriA Tertile 2 vs. 1 | 0.921 | 0.662 | 1.282 | 50  |
| Male | Bound | PFTriA Tertile 3 vs. 1 | 0.798 | 0.580 | 1.097 |     |
| Male | Bound | PFUnDA Tertile 2 vs. 1 | 0.981 | 0.837 | 1.150 | 173 |
| Male | Bound | PFUnDA Tertile 3 vs. 1 | 0.786 | 0.658 | 0.939 |     |
| Male | Bound | PFDS Tertile 2 vs. 1   | 0.947 | 0.740 | 1.213 | 83  |
| Male | Bound | PFDS Tertile 3 vs. 1   | 0.952 | 0.740 | 1.226 |     |
| Male | Bound | PFHxS Tertile 2 vs. 1  | 0.875 | 0.735 | 1.040 | 173 |
| Male | Bound | PFHxS Tertile 3 vs. 1  | 0.892 | 0.745 | 1.067 |     |
| Male | Bound | PFOS Tertile 2 vs. 1   | 0.969 | 0.809 | 1.162 | 158 |
| Male | Bound | PFOS Tertile 2 vs. 2   | 0.867 | 0.728 | 1.031 |     |
| Male | Bound | PFOSA Tertile 2 vs. 1  | 0.929 | 0.782 | 1.104 | 140 |
| Male | Bound | PFOSA Tertile 3 vs. 1  | 0.701 | 0.572 | 0.860 |     |
| Male | Bound | ΣPFCA Tertile 2 vs. 1  | 0.876 | 0.712 | 1.078 | 110 |
| Male | Bound | ΣPFCA Tertile 3 vs. 1  | 0.730 | 0.594 | 0.898 |     |
| Male | Bound | ΣPFSA Tertile 2 vs. 1  | 0.934 | 0.749 | 1.166 | 110 |
| Male | Bound | ΣPFSA Tertile 3 vs. 1  | 0.874 | 0.714 | 1.070 |     |
| Male | Bound | ΣPFAS Tertile 2 vs. 1  | 0.958 | 0.801 | 1.147 | 158 |
| Male | Bound | ΣPFAS Tertile 3 vs. 1  | 0.880 | 0.737 | 1.050 |     |
| Male | Total | PFDA Tertile 2 vs. 1   | 1.351 | 1.121 | 1.628 | 164 |
| Male | Total | PFDA Tertile 3 vs. 1   | 1.054 | 0.903 | 1.230 |     |
| Male | Total | PFDoDA Tertile 2 vs. 1 | 1.382 | 1.152 | 1.659 | 164 |
| Male | Total | PFDoDA Tertile 3 vs. 1 | 1.020 | 0.865 | 1.204 |     |
| Male | Total | PFHpA Tertile 2 vs. 1  | 1.087 | 0.848 | 1.393 | 75  |
| Male | Total | PFHpA Tertile 3 vs. 1  | 0.873 | 0.646 | 1.179 |     |
| Male | Total | PFNA Tertile 2 vs. 1   | 0.978 | 0.804 | 1.190 | 164 |
| Male | Total | PFNA Tertile 3 vs. 1   | 0.802 | 0.656 | 0.981 |     |

|          |       |                        |       |       |       |     |
|----------|-------|------------------------|-------|-------|-------|-----|
| Male     | Total | PFOA Tertile 2 vs. 1   | 0.796 | 0.662 | 0.958 | 164 |
| Male     | Total | PFOA Tertile 3 vs. 1   | 0.789 | 0.648 | 0.960 |     |
| Male     | Total | PFTeA Tertile 2 vs. 1  | 0.573 | 0.383 | 0.857 | 65  |
| Male     | Total | PFTeA Tertile 3 vs. 1  | 0.908 | 0.729 | 1.131 |     |
| Male     | Total | PFTriA Tertile 2 vs. 1 | 0.788 | 0.615 | 1.011 | 49  |
| Male     | Total | PFTriA Tertile 3 vs. 1 | 0.882 | 0.628 | 1.239 |     |
| Male     | Total | PFUnDA Tertile 2 vs. 1 | 1.035 | 0.846 | 1.266 | 164 |
| Male     | Total | PFUnDA Tertile 3 vs. 1 | 0.895 | 0.751 | 1.067 |     |
| Male     | Total | PFDS Tertile 2 vs. 1   | 0.919 | 0.700 | 1.207 | 78  |
| Male     | Total | PFDS Tertile 3 vs. 1   | 1.195 | 0.941 | 1.519 |     |
| Male     | Total | PFHxS Tertile 2 vs. 1  | 0.780 | 0.648 | 0.939 | 164 |
| Male     | Total | PFHxS Tertile 3 vs. 1  | 0.828 | 0.672 | 1.021 |     |
| Male     | Total | PFOS Tertile 2 vs. 1   | 0.860 | 0.715 | 1.034 | 150 |
| Male     | Total | PFOS Tertile 2 vs. 2   | 0.819 | 0.677 | 0.990 |     |
| Male     | Total | PFOSA Tertile 2 vs. 1  | 0.828 | 0.674 | 1.018 | 132 |
| Male     | Total | PFOSA Tertile 3 vs. 1  | 0.804 | 0.651 | 0.993 |     |
| Male     | Total | ΣPFCA Tertile 2 vs. 1  | 0.777 | 0.624 | 0.966 | 104 |
| Male     | Total | ΣPFCA Tertile 3 vs. 1  | 0.673 | 0.562 | 0.807 |     |
| Male     | Total | ΣPFSA Tertile 2 vs. 1  | 0.750 | 0.606 | 0.927 | 104 |
| Male     | Total | ΣPFSA Tertile 3 vs. 1  | 0.731 | 0.592 | 0.902 |     |
| Male     | Total | ΣPFAS Tertile 2 vs. 1  | 0.881 | 0.728 | 1.066 | 150 |
| Male     | Total | ΣPFAS Tertile 3 vs. 1  | 0.849 | 0.702 | 1.026 |     |
| Juvenile | Free  | PFDA Tertile 2 vs. 1   | 0.959 | 0.573 | 1.606 | 59  |
| Juvenile | Free  | PFDA Tertile 3 vs. 1   | 1.222 | 0.758 | 1.969 |     |
| Juvenile | Free  | PFDoDA Tertile 2 vs. 1 | 0.967 | 0.640 | 1.460 | 59  |
| Juvenile | Free  | PFDoDA Tertile 3 vs. 1 | 1.123 | 0.748 | 1.687 |     |
| Juvenile | Free  | PFHpA Tertile 2 vs. 1  | 0.128 | 0.039 | 0.416 | 20  |
| Juvenile | Free  | PFHpA Tertile 3 vs. 1  | 0.855 | 0.397 | 1.840 |     |
| Juvenile | Free  | PFNA Tertile 2 vs. 1   | 0.864 | 0.464 | 1.609 | 59  |
| Juvenile | Free  | PFNA Tertile 3 vs. 1   | 1.055 | 0.570 | 1.953 |     |
| Juvenile | Free  | PFOA Tertile 2 vs. 1   | 0.643 | 0.398 | 1.039 | 59  |
| Juvenile | Free  | PFOA Tertile 3 vs. 1   | 0.902 | 0.574 | 1.417 |     |

|          |       |                        |       |       |        |    |
|----------|-------|------------------------|-------|-------|--------|----|
| Juvenile | Free  | PFTeA Tertile 2 vs. 1  | 0.132 | 0.102 | 0.172  | 36 |
| Juvenile | Free  | PFTeA Tertile 3 vs. 1  | 0.739 | 0.514 | 1.062  |    |
| Juvenile | Free  | PFTriA Tertile 2 vs. 1 | 1.077 | 0.604 | 1.921  | 26 |
| Juvenile | Free  | PFTriA Tertile 3 vs. 1 | 1.372 | 0.759 | 2.478  |    |
| Juvenile | Free  | PUnDA Tertile 2 vs. 1  | 0.778 | 0.486 | 1.246  | 59 |
| Juvenile | Free  | PUnDA Tertile 3 vs. 1  | 1.069 | 0.704 | 1.624  |    |
| Juvenile | Free  | PFDS Tertile 2 vs. 1   | 4.828 | 1.291 | 18.053 | 20 |
| Juvenile | Free  | PFDS Tertile 3 vs. 1   | 7.481 | 2.522 | 22.194 |    |
| Juvenile | Free  | PFHxS Tertile 2 vs. 1  | 0.644 | 0.396 | 1.047  | 59 |
| Juvenile | Free  | PFHxS Tertile 3 vs. 1  | 0.579 | 0.385 | 0.871  |    |
| Juvenile | Free  | PFOS Tertile 2 vs. 1   | 0.986 | 0.611 | 1.593  | 58 |
| Juvenile | Free  | PFOS Tertile 2 vs. 2   | 0.752 | 0.491 | 1.151  |    |
| Juvenile | Free  | PFOSA Tertile 2 vs. 1  | 0.748 | 0.478 | 1.170  | 56 |
| Juvenile | Free  | PFOSA Tertile 3 vs. 1  | 1.055 | 0.707 | 1.574  |    |
| Juvenile | Free  | ΣPFCA Tertile 2 vs. 1  | 0.929 | 0.558 | 1.548  | 51 |
| Juvenile | Free  | ΣPFCA Tertile 3 vs. 1  | 0.990 | 0.647 | 1.515  |    |
| Juvenile | Free  | ΣPFSA Tertile 2 vs. 1  | 0.876 | 0.553 | 1.387  | 51 |
| Juvenile | Free  | ΣPFSA Tertile 3 vs. 1  | 0.876 | 0.437 | 0.967  |    |
| Juvenile | Free  | ΣPFAS Tertile 2 vs. 1  | 1.212 | 0.729 | 2.015  | 58 |
| Juvenile | Free  | ΣPFAS Tertile 3 vs. 1  | 0.913 | 0.576 | 1.446  |    |
| Juvenile | Bound | PFDA Tertile 2 vs. 1   | 1.057 | 0.832 | 1.344  | 62 |
| Juvenile | Bound | PFDA Tertile 3 vs. 1   | 0.532 | 0.403 | 0.704  |    |
| Juvenile | Bound | PFDoDA Tertile 2 vs. 1 | 0.889 | 0.682 | 1.158  | 62 |
| Juvenile | Bound | PFDoDA Tertile 3 vs. 1 | 0.577 | 0.436 | 0.764  |    |
| Juvenile | Bound | PFHpA Tertile 2 vs. 1  | 1.102 | 0.747 | 1.625  | 22 |
| Juvenile | Bound | PFHpA Tertile 3 vs. 1  | 0.933 | 0.591 | 1.471  |    |
| Juvenile | Bound | PFNA Tertile 2 vs. 1   | 1.097 | 0.817 | 1.472  | 62 |
| Juvenile | Bound | PFNA Tertile 3 vs. 1   | 0.601 | 0.430 | 0.842  |    |
| Juvenile | Bound | PFOA Tertile 2 vs. 1   | 0.956 | 0.723 | 1.264  | 62 |
| Juvenile | Bound | PFOA Tertile 3 vs. 1   | 0.562 | 0.408 | 0.773  |    |
| Juvenile | Bound | PFTeA Tertile 2 vs. 1  | 1.238 | 0.989 | 1.551  | 37 |
| Juvenile | Bound | PFTeA Tertile 3 vs. 1  | 1.875 | 1.379 | 2.551  |    |

|          |       |                        |       |       |       |    |
|----------|-------|------------------------|-------|-------|-------|----|
| Juvenile | Bound | PFTriA Tertile 2 vs. 1 | 0.596 | 0.396 | 0.896 | 26 |
| Juvenile | Bound | PFTriA Tertile 3 vs. 1 | 0.730 | 0.428 | 1.243 |    |
| Juvenile | Bound | PUnDA Tertile 2 vs. 1  | 1.078 | 0.837 | 1.388 | 62 |
| Juvenile | Bound | PUnDA Tertile 3 vs. 1  | 0.598 | 0.450 | 0.795 |    |
| Juvenile | Bound | PFDS Tertile 2 vs. 1   | 0.765 | 0.500 | 1.170 | 22 |
| Juvenile | Bound | PFDS Tertile 3 vs. 1   | 0.620 | 0.397 | 0.970 |    |
| Juvenile | Bound | PFHxS Tertile 2 vs. 1  | 1.052 | 0.674 | 1.641 | 62 |
| Juvenile | Bound | PFHxS Tertile 3 vs. 1  | 0.841 | 0.554 | 1.275 |    |
| Juvenile | Bound | PFOS Tertile 2 vs. 1   | 1.042 | 0.730 | 1.489 | 61 |
| Juvenile | Bound | PFOS Tertile 2 vs. 2   | 0.754 | 0.567 | 1.003 |    |
| Juvenile | Bound | PFOSA Tertile 2 vs. 1  | 1.056 | 0.820 | 1.360 | 59 |
| Juvenile | Bound | PFOSA Tertile 3 vs. 1  | 0.510 | 0.381 | 0.683 |    |
| Juvenile | Bound | ΣPFCA Tertile 2 vs. 1  | 0.975 | 0.740 | 1.285 | 53 |
| Juvenile | Bound | ΣPFCA Tertile 3 vs. 1  | 0.524 | 0.390 | 0.704 |    |
| Juvenile | Bound | ΣPFSA Tertile 2 vs. 1  | 1.029 | 0.699 | 1.517 | 53 |
| Juvenile | Bound | ΣPFSA Tertile 3 vs. 1  | 0.761 | 0.561 | 1.032 |    |
| Juvenile | Bound | ΣPFAS Tertile 2 vs. 1  | 0.949 | 0.665 | 1.354 | 61 |
| Juvenile | Bound | ΣPFAS Tertile 3 vs. 1  | 0.728 | 0.552 | 0.960 |    |
| Juvenile | Total | PFDA Tertile 2 vs. 1   | 0.990 | 0.736 | 1.331 | 59 |
| Juvenile | Total | PFDA Tertile 3 vs. 1   | 0.966 | 0.728 | 1.282 |    |
| Juvenile | Total | PFDODA Tertile 2 vs. 1 | 0.930 | 0.715 | 1.210 | 59 |
| Juvenile | Total | PFDODA Tertile 3 vs. 1 | 0.943 | 0.739 | 1.203 |    |
| Juvenile | Total | PFHpA Tertile 2 vs. 1  | 0.325 | 0.220 | 0.479 | 20 |
| Juvenile | Total | PFHpA Tertile 3 vs. 1  | 0.902 | 0.637 | 1.276 |    |
| Juvenile | Total | PFNA Tertile 2 vs. 1   | 0.955 | 0.661 | 1.381 | 59 |
| Juvenile | Total | PFNA Tertile 3 vs. 1   | 0.920 | 0.639 | 1.324 |    |
| Juvenile | Total | PFOA Tertile 2 vs. 1   | 0.757 | 0.574 | 0.998 | 59 |
| Juvenile | Total | PFOA Tertile 3 vs. 1   | 0.807 | 0.625 | 1.043 |    |
| Juvenile | Total | PFTeA Tertile 2 vs. 1  | 0.295 | 0.244 | 0.357 | 36 |
| Juvenile | Total | PFTeA Tertile 3 vs. 1  | 0.987 | 0.761 | 1.282 |    |
| Juvenile | Total | PFTriA Tertile 2 vs. 1 | 0.929 | 0.600 | 1.437 | 26 |
| Juvenile | Total | PFTriA Tertile 3 vs. 1 | 1.188 | 0.792 | 1.783 |    |

|          |       |                          |       |       |       |     |
|----------|-------|--------------------------|-------|-------|-------|-----|
| Juvenile | Total | PFAUnDA Tertile 2 vs. 1  | 0.880 | 0.666 | 1.163 | 59  |
| Juvenile | Total | PFAUnDA Tertile 3 vs. 1  | 0.909 | 0.700 | 1.180 |     |
| Juvenile | Total | PFAFDS Tertile 2 vs. 1   | 2.052 | 1.308 | 3.217 | 20  |
| Juvenile | Total | PFAFDS Tertile 3 vs. 1   | 2.111 | 1.517 | 2.939 |     |
| Juvenile | Total | PFAFHxS Tertile 2 vs. 1  | 0.784 | 0.595 | 1.033 | 59  |
| Juvenile | Total | PFAFHxS Tertile 3 vs. 1  | 0.663 | 0.524 | 0.840 |     |
| Juvenile | Total | PFAFOS Tertile 2 vs. 1   | 1.011 | 0.771 | 1.327 | 58  |
| Juvenile | Total | PFAFOS Tertile 2 vs. 2   | 0.766 | 0.591 | 0.992 |     |
| Juvenile | Total | PFAFOSA Tertile 2 vs. 1  | 0.862 | 0.662 | 1.122 | 56  |
| Juvenile | Total | PFAFOSA Tertile 3 vs. 1  | 0.885 | 0.688 | 1.140 |     |
| Juvenile | Total | ΣPFAFCA Tertile 2 vs. 1  | 0.936 | 0.699 | 1.253 | 51  |
| Juvenile | Total | ΣPFAFCA Tertile 3 vs. 1  | 0.848 | 0.653 | 1.100 |     |
| Juvenile | Total | ΣPFAFSA Tertile 2 vs. 1  | 0.911 | 0.698 | 1.191 | 51  |
| Juvenile | Total | ΣPFAFSA Tertile 3 vs. 1  | 0.707 | 0.550 | 0.909 |     |
| Juvenile | Total | ΣPFAFAS Tertile 2 vs. 1  | 1.131 | 0.838 | 1.526 | 58  |
| Juvenile | Total | ΣPFAFAS Tertile 3 vs. 1  | 0.863 | 0.648 | 1.150 |     |
| Adult    | Free  | PFAFDA Tertile 2 vs. 1   | 1.375 | 1.077 | 1.755 | 186 |
| Adult    | Free  | PFAFDA Tertile 3 vs. 1   | 0.960 | 0.774 | 1.191 |     |
| Adult    | Free  | PFAFDoDA Tertile 2 vs. 1 | 1.216 | 0.953 | 1.551 | 186 |
| Adult    | Free  | PFAFDoDA Tertile 3 vs. 1 | 0.844 | 0.672 | 1.062 |     |
| Adult    | Free  | PFAFHpA Tertile 2 vs. 1  | 1.770 | 0.975 | 3.214 | 78  |
| Adult    | Free  | PFAFHpA Tertile 3 vs. 1  | 0.745 | 0.425 | 1.305 |     |
| Adult    | Free  | PFAFNA Tertile 2 vs. 1   | 0.973 | 0.769 | 1.232 | 186 |
| Adult    | Free  | PFAFNA Tertile 3 vs. 1   | 0.716 | 0.569 | 0.902 |     |
| Adult    | Free  | PFAFOA Tertile 2 vs. 1   | 0.672 | 0.543 | 0.833 | 186 |
| Adult    | Free  | PFAFOA Tertile 3 vs. 1   | 0.680 | 0.538 | 0.859 |     |
| Adult    | Free  | PFAFTeA Tertile 2 vs. 1  | 0.579 | 0.402 | 0.834 | 81  |
| Adult    | Free  | PFAFTeA Tertile 3 vs. 1  | 0.778 | 0.608 | 0.994 |     |
| Adult    | Free  | PFAFTriA Tertile 2 vs. 1 | 0.831 | 0.619 | 1.114 | 64  |
| Adult    | Free  | PFAFTriA Tertile 3 vs. 1 | 0.701 | 0.446 | 1.102 |     |
| Adult    | Free  | PFAUnDA Tertile 2 vs. 1  | 1.108 | 0.858 | 1.430 | 186 |
| Adult    | Free  | PFAUnDA Tertile 3 vs. 1  | 0.899 | 0.701 | 1.152 |     |



|       |       |                        |       |       |       |     |
|-------|-------|------------------------|-------|-------|-------|-----|
| Adult | Free  | PFDS Tertile 2 vs. 1   | 0.566 | 0.307 | 1.043 | 81  |
| Adult | Free  | PFDS Tertile 3 vs. 1   | 1.085 | 0.650 | 1.814 |     |
| Adult | Free  | PFHxS Tertile 2 vs. 1  | 0.863 | 0.679 | 1.097 | 186 |
| Adult | Free  | PFHxS Tertile 3 vs. 1  | 0.880 | 0.693 | 1.116 |     |
| Adult | Free  | PFOS Tertile 2 vs. 1   | 0.885 | 0.692 | 1.131 | 164 |
| Adult | Free  | PFOS Tertile 2 vs. 2   | 0.746 | 0.596 | 0.935 |     |
| Adult | Free  | PFOSA Tertile 2 vs. 1  | 0.717 | 0.551 | 0.935 | 156 |
| Adult | Free  | PFOSA Tertile 3 vs. 1  | 0.698 | 0.563 | 0.864 |     |
| Adult | Free  | ΣPFCA Tertile 2 vs. 1  | 0.653 | 0.514 | 0.829 | 122 |
| Adult | Free  | ΣPFCA Tertile 3 vs. 1  | 0.581 | 0.475 | 0.711 |     |
| Adult | Free  | ΣPFSA Tertile 2 vs. 1  | 0.808 | 0.622 | 1.048 | 122 |
| Adult | Free  | ΣPFSA Tertile 3 vs. 1  | 0.641 | 0.519 | 0.792 |     |
| Adult | Free  | ΣPFAS Tertile 2 vs. 1  | 0.863 | 0.675 | 1.105 | 164 |
| Adult | Free  | ΣPFAS Tertile 3 vs. 1  | 0.770 | 0.616 | 0.962 |     |
| Adult | Bound | PFDA Tertile 2 vs. 1   | 1.008 | 0.856 | 1.187 | 192 |
| Adult | Bound | PFDA Tertile 3 vs. 1   | 0.722 | 0.598 | 0.872 |     |
| Adult | Bound | PFDODA Tertile 2 vs. 1 | 1.290 | 1.093 | 1.523 | 192 |
| Adult | Bound | PFDODA Tertile 3 vs. 1 | 0.882 | 0.732 | 1.064 |     |
| Adult | Bound | PFHpA Tertile 2 vs. 1  | 1.060 | 0.793 | 1.416 | 81  |
| Adult | Bound | PFHpA Tertile 3 vs. 1  | 0.730 | 0.571 | 0.934 |     |
| Adult | Bound | PFNA Tertile 2 vs. 1   | 0.887 | 0.746 | 1.055 | 192 |
| Adult | Bound | PFNA Tertile 3 vs. 1   | 0.699 | 0.586 | 0.834 |     |
| Adult | Bound | PFOA Tertile 2 vs. 1   | 0.866 | 0.726 | 1.033 | 192 |
| Adult | Bound | PFOA Tertile 3 vs. 1   | 0.732 | 0.612 | 0.876 |     |
| Adult | Bound | PFTeA Tertile 2 vs. 1  | 0.896 | 0.679 | 1.183 | 83  |
| Adult | Bound | PFTeA Tertile 3 vs. 1  | 0.833 | 0.651 | 1.066 |     |
| Adult | Bound | PFTriA Tertile 2 vs. 1 | 0.788 | 0.594 | 1.045 | 65  |
| Adult | Bound | PFTriA Tertile 3 vs. 1 | 0.738 | 0.571 | 0.955 |     |
| Adult | Bound | PFUnDA Tertile 2 vs. 1 | 0.929 | 0.783 | 1.102 | 192 |
| Adult | Bound | PFUnDA Tertile 3 vs. 1 | 0.742 | 0.615 | 0.895 |     |
| Adult | Bound | PFDS Tertile 2 vs. 1   | 0.974 | 0.765 | 1.240 | 84  |
| Adult | Bound | PFDS Tertile 3 vs. 1   | 0.823 | 0.630 | 1.074 |     |

|       |       |                        |       |       |       |     |
|-------|-------|------------------------|-------|-------|-------|-----|
| Adult | Bound | PFHxS Tertile 2 vs. 1  | 0.932 | 0.780 | 1.114 | 192 |
| Adult | Bound | PFHxS Tertile 3 vs. 1  | 0.999 | 0.827 | 1.205 |     |
| Adult | Bound | PFOS Tertile 2 vs. 1   | 0.851 | 0.700 | 1.034 | 169 |
| Adult | Bound | PFOS Tertile 2 vs. 2   | 0.864 | 0.711 | 1.048 |     |
| Adult | Bound | PFOSA Tertile 2 vs. 1  | 0.910 | 0.760 | 1.090 | 161 |
| Adult | Bound | PFOSA Tertile 3 vs. 1  | 0.652 | 0.531 | 0.801 |     |
| Adult | Bound | ΣPFCA Tertile 2 vs. 1  | 0.803 | 0.638 | 1.009 | 126 |
| Adult | Bound | ΣPFCA Tertile 3 vs. 1  | 0.720 | 0.578 | 0.898 |     |
| Adult | Bound | ΣPFSA Tertile 2 vs. 1  | 0.978 | 0.779 | 1.227 | 126 |
| Adult | Bound | ΣPFSA Tertile 3 vs. 1  | 0.969 | 0.760 | 1.236 |     |
| Adult | Bound | ΣPFAS Tertile 2 vs. 1  | 0.874 | 0.720 | 1.060 | 169 |
| Adult | Bound | ΣPFAS Tertile 3 vs. 1  | 0.865 | 0.712 | 1.052 |     |
| Adult | Total | PFDA Tertile 2 vs. 1   | 1.320 | 1.113 | 1.566 | 186 |
| Adult | Total | PFDA Tertile 3 vs. 1   | 0.907 | 0.791 | 1.040 |     |
| Adult | Total | PFDODA Tertile 2 vs. 1 | 1.266 | 1.060 | 1.513 | 186 |
| Adult | Total | PFDODA Tertile 3 vs. 1 | 0.892 | 0.759 | 1.048 |     |
| Adult | Total | PFHpA Tertile 2 vs. 1  | 1.306 | 1.047 | 1.627 | 78  |
| Adult | Total | PFHpA Tertile 3 vs. 1  | 0.767 | 0.586 | 1.004 |     |
| Adult | Total | PFNA Tertile 2 vs. 1   | 0.949 | 0.797 | 1.129 | 186 |
| Adult | Total | PFNA Tertile 3 vs. 1   | 0.709 | 0.600 | 0.838 |     |
| Adult | Total | PFOA Tertile 2 vs. 1   | 0.756 | 0.641 | 0.892 | 186 |
| Adult | Total | PFOA Tertile 3 vs. 1   | 0.710 | 0.592 | 0.851 |     |
| Adult | Total | PFTeA Tertile 2 vs. 1  | 0.701 | 0.524 | 0.939 | 81  |
| Adult | Total | PFTeA Tertile 3 vs. 1  | 0.827 | 0.661 | 1.035 |     |
| Adult | Total | PFTriA Tertile 2 vs. 1 | 0.805 | 0.663 | 0.979 | 64  |
| Adult | Total | PFTriA Tertile 3 vs. 1 | 0.758 | 0.545 | 1.054 |     |
| Adult | Total | PFUnDA Tertile 2 vs. 1 | 1.050 | 0.867 | 1.271 | 186 |
| Adult | Total | PFUnDA Tertile 3 vs. 1 | 0.847 | 0.702 | 1.023 |     |
| Adult | Total | PFDS Tertile 2 vs. 1   | 0.906 | 0.703 | 1.168 | 81  |
| Adult | Total | PFDS Tertile 3 vs. 1   | 1.016 | 0.781 | 1.322 |     |
| Adult | Total | PFHxS Tertile 2 vs. 1  | 0.873 | 0.730 | 1.044 | 186 |
| Adult | Total | PFHxS Tertile 3 vs. 1  | 0.907 | 0.751 | 1.095 |     |

|       |       |                       |       |       |       |     |
|-------|-------|-----------------------|-------|-------|-------|-----|
| Adult | Total | PFOS Tertile 2 vs. 1  | 0.897 | 0.746 | 1.078 | 164 |
| Adult | Total | PFOS Tertile 2 vs. 2  | 0.781 | 0.648 | 0.940 |     |
| Adult | Total | PFOSA Tertile 2 vs. 1 | 0.796 | 0.655 | 0.967 | 156 |
| Adult | Total | PFOSA Tertile 3 vs. 1 | 0.705 | 0.588 | 0.846 |     |
| Adult | Total | ΣPFCA Tertile 2 vs. 1 | 0.714 | 0.587 | 0.869 | 122 |
| Adult | Total | ΣPFCA Tertile 3 vs. 1 | 0.618 | 0.587 | 0.725 |     |
| Adult | Total | ΣPFSA Tertile 2 vs. 1 | 0.856 | 0.698 | 1.051 | 122 |
| Adult | Total | ΣPFSA Tertile 3 vs. 1 | 0.728 | 0.593 | 0.893 |     |
| Adult | Total | ΣPFAS Tertile 2 vs. 1 | 0.885 | 0.736 | 1.065 | 164 |
| Adult | Total | ΣPFAS Tertile 3 vs. 1 | 0.799 | 0.665 | 0.960 |     |
